# Supplementary material for: Polymer-supported oligosaccharide synthesis using ultrafiltration methodology
Source: Royal Society of Chemistry journal article supplement (doi:10.1039/b705324j), 2007-01-01
Supplement: b705324j.pdf [file b705324j.pdf]

## Supporting Information

Shino Manabe,\* Akiharu Ueki, Yukishige Ito\*

**General Procedures.** All chemicals were reagent grade and were used as supplied unless otherwise noted. Dry dichloromethane, THF, DMF, and toluene were purchased from Kanto Chemical Co. Technical grade or reagent grade solvents for extraction and chromatography were used without further purification. Molecular sieves AW 300 was purchased from Aldrich and activated by heating at 170 °C *in vacuo* just before use. Silica gel 60 F<sub>254</sub> plates (E. Merck) were used for analytical and preparative thin-layer chromatography. Silica gel 60N (spherical, neutral, Kanto Chemical Co., Inc, Tokyo) was used for flash column chromatography (40-100 μm) and open column (100-200 μm) chromatography. <sup>1</sup>H and <sup>13</sup>C NMR spectra were recorded at ambient temperature (23~24 °C) in CDCl<sub>3</sub> using JEOL EX 400 MHz spectrometer. <sup>13</sup>C-NMR spectra were taken in CDCl<sub>3</sub> unless otherwise mentioned, and CHCl<sub>3</sub> (δ 77.0 ppm) was used as an internal standard. Chemical shifts are reported in ppm relative to internal tetramethylsilane (δ = 0.00 ppm or CHCl<sub>3</sub> as 7.26 ppm) for <sup>1</sup>H and internal CDCl<sub>3</sub> (δ = 77.00 ppm) for <sup>13</sup>C NMR spectra. Optical rotations were measured with a JASCO DIP-310 polarimeter. MALDI-TOF MS spectra were measured by Shimadzu AXIMA-CFR

using DHBA and CHCA as matrix. Melting points (not corrected) were measured with a YANACO micro melting point apparatus. Ultrafiltration stirred cell was purchased from Millipore and the picture was shown below. Amicon Ultracell PL Membrane Disk (Molecular cut-off 1000) was purchased from Millipore and was used for ultrafiltration.

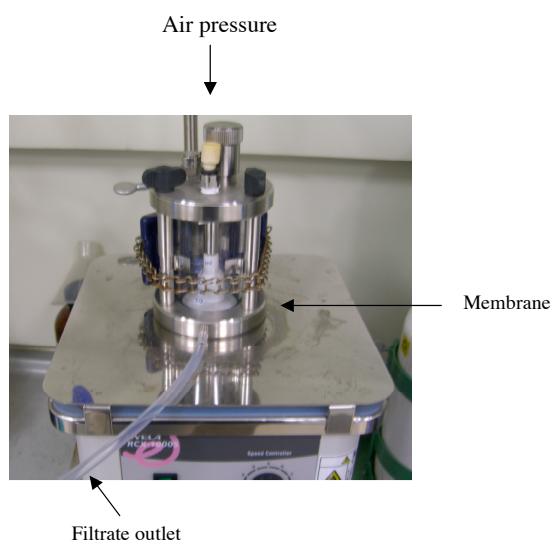

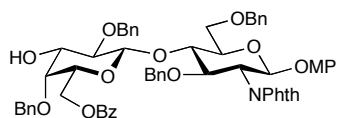

***p*-Methoxyphenyl *O*-(6-*O*-benzoyl-2,4-di-*O*-benzyl- $\beta$ -D-galactopyranosyl)-(1 $\rightarrow$ 4)-*O*-3,6-di-*O*-benzyl-2-deoxy-2-phthalimido- $\beta$ -D-glucopyranoside**

To a solution of the diol **1** (200.0 mg, 0.213 mmol), pyridine (36  $\mu$ L, 0.426 mmol) in 1,2-dichloroethane (3 mL) was added benzoyl chloride (38  $\mu$ L, 0.330 mmol) at 0 °C under N<sub>2</sub> atmosphere. The mixture was stirred for 7 h at 0 °C, then the reaction mixture was quenched with 1 M HCl aq. The aqueous layer was extracted with EtOAc. The combined organic layers were washed with sat. NaHCO<sub>3</sub>, H<sub>2</sub>O and brine. After drying the extract over MgSO<sub>4</sub>, the solvent was evaporated. The residue was purified by silica gel column chromatography (hexane:EtOAc 3:1 to 2:1) to give 197.0 mg (89%) of the product.  $[\alpha]_D^{25} + 62.5$  (*c* 1.0, CHCl<sub>3</sub>); <sup>1</sup>H-NMR (CDCl<sub>3</sub>)  $\delta$  8.04-7.98 (2H, m, Ar-H), 7.86-7.56 (4H, m, Ar-H), 7.54-7.48 (2H, m, Ar-H), 7.42-7.15 (16H, m, Ar-H), 7.03-6.96 (2H, m, Ar-H), 6.86-6.77 (5H, m, Ar-H), 6.68-6.63 (2H, m, Ar-H), 5.61 (1H, d, *J* = 8.1 Hz, H-1), 4.92 (1H, d, *J* = 12.2 Hz, benzyl), 4.91 (1H, d, *J* = 11.2 Hz, benzyl), 4.81 (1H, d, *J* = 11.7 Hz, benzyl), 4.70 (1H, d, *J* = 11.2 Hz, benzyl), 4.62 (1H, d, *J* = 11.7 Hz, benzyl), 4.57 (1H, d, *J* = 12.2 Hz, benzyl), 4.53 (1H, d, *J* = 13.2 Hz, benzyl), 4.46 (1H, d, *J* = 7.3 Hz, H-1b), 4.49-4.38 (4H, m), 4.35 (1H, dd, *J* = 11.0, 6.4 Hz, H-6b), 4.25 (1H, dd, *J* = 11.0, 6.8 Hz, H-6b), 4.11 (1H, d, *J* = 9.5, 7.1 Hz, H-4a), 3.89-3.78 (3H, m), 3.74-3.66 (1H, m, H-5a), 3.68 (3H, s, OMe), 3.64-3.53 (3H, m), 2.24 (1H, d, *J* = 4.7 Hz, OH); <sup>13</sup>C-NMR (CDCl<sub>3</sub>)  $\delta$  165.9 (C), 155.0 (C), 150.7 (C), 138.4 (C), 138.0 (C), 133.6 (CH), 133.0 (CH), 129.6 (CH), 129.6 (CH), 128.4 (CH), 128.4 (CH), 128.2 (CH), 128.1 (CH), 127.9 (CH), 127.8 (CH), 127.7 (CH), 127.6 (CH), 127.6 (CH), 127.4 (CH), 127.3 (CH), 126.8 (CH), 123.1 (CH), 118.5 (CH), 114.2 (CH), 103.2 (CH), 97.5 (CH), 80.1 (CH), 78.7 (CH), 76.9 (CH), 75.5 (CH), 75.4 (CH), 75.2 (CH<sub>2</sub>), 75.0 (CH<sub>2</sub>), 74.5 (CH<sub>2</sub>), 74.2 (CH), 73.1 (CH<sub>2</sub>), 72.4 (CH), 67.9 (CH<sub>2</sub>), 62.7 (CH<sub>2</sub>), 55.6 (CH<sub>3</sub>).

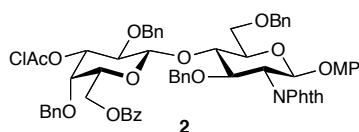

***p*-Methoxyphenyl *O*-(6-*O*-benzoyl-2,4-di-*O*-benzyl-3-chloroacetyl- $\beta$ -D-galactopyranosyl)-(1 $\rightarrow$ 4)-*O*-3,6-di-*O*-benzyl-2-deoxy-2-phthalimido- $\beta$ -D-**

## glucopyranoside 2

To a solution of the mono-alcohol (1.037 g, 0.995 mmol), pyridine (0.40 mL, 4.98 mmol) in 1,2-dichloroethane (15 mL) was added chloroacetic anhydride (255.2 mg, 1.49 mmol) at 0 °C under N<sub>2</sub> atmosphere. The mixture was stirred for 1.5 h at room temperature. The reaction mixture was quenched with MeOH and stirred for 0.5 h. After dilution of the mixture with EtOAc, the organic layer was washed with aqueous 2 M HCl, H<sub>2</sub>O, and brine. After drying the extract over MgSO<sub>4</sub>, the solvent was evaporated. The residue was purified by silica gel column chromatography (toluene:EtOAc 15:1 to 10:1) to give 1.10 g (99%) of compound **2**.  $[\alpha]_D + 61.9$  (*c* 1.0, CHCl<sub>3</sub>); <sup>1</sup>H-NMR (CDCl<sub>3</sub>) δ 8.04-7.98 (2H, m, Ar-H), 7.88-7.58 (4H, m, Ar-H), 7.56-7.48 (2H, m, Ar-H), 7.42-7.15 (16H, m, Ar-H), 7.04-6.98 (2H, m, Ar-H), 6.87-6.79 (5H, m, Ar-H), 6.71-6.65 (2H, m, Ar-H), 5.62 (1H, d, *J* = 8.1 Hz, H-1a), 4.91 (1H, d, *J* = 12.2 Hz, benzyl), 4.87 (1H, dd, *J* = 10.2, 3.2 Hz, H-3b), 4.82 (1H, d, *J* = 11.7 Hz, benzyl), 4.65 (1H, d, *J* = 11.7 Hz, benzyl), 4.61 (1H, d, *J* = 12.0 Hz, benzyl), 4.58 (1H, d, *J* = 12.2 Hz, benzyl), 4.54 (1H, d, *J* = 12.0 Hz, benzyl), 4.52 (1H, d, *J* = 12.2 Hz, benzyl), 4.52 (1H, d, *J* = 7.6 Hz, H-1b), 4.45 (1H, dd, *J* = 11.0, 8.1 Hz, H-2a), 4.40 (1H, d, *J* = 12.2 Hz, benzyl), 4.39 (1H, dd, *J* = 11.0, 8.1 Hz, H-3a), 4.32 (1H, dd, *J* = 11.0, 7.1 Hz, H-6b), 4.24 (1H, dd, *J* = 11.0, 6.6 Hz, H-6b), 4.15 (1H, dd, *J* = 9.8, 8.1 Hz, H-4a), 3.89 (1H, d, *J* = 3.2 Hz, H-4b), 3.86 (1H, dd, *J* = 11.0, 4.1 Hz, H-6a), 3.81 (1H, d, *J* = 10.2, 7.6 Hz, H-2b), 3.82-3.75 (1H, m, H-6a), 3.75 (1H, d, *J* = 14.9 Hz, one of ClCH<sub>2</sub>), 3.70 (3H, s, OMe), 3.70 (1H, d, *J* = 14.9 Hz, one of ClCH<sub>2</sub>), 3.75-3.64 (1H, m, H-5a), 3.59 (1H, dd, *J* = 7.1, 6.6 Hz, H-5b); <sup>13</sup>C-NMR (CDCl<sub>3</sub>) δ 166.4 (C), 165.7 (C), 155.0 (C), 150.7 (C), 138.4 (C), 137.9 (C), 137.4 (C), 133.6 (CH), 133.1 (CH), 131.4 (C), 129.6 (CH), 128.5 (CH), 128.4 (CH), 128.3 (CH), 128.2 (CH), 128.2 (CH), 127.8 (CH), 127.7 (CH), 127.7 (CH), 127.6 (CH), 127.6 (CH), 127.4 (CH), 126.8 (CH), 123.1 (CH), 118.5 (CH), 114.2 (CH), 103.0 (CH), 97.6 (CH), 78.6 (CH), 76.9 (CH), 76.8 (CH), 75.2 (CH), 75.2 (CH<sub>2</sub>), 75.1 (CH<sub>2</sub>), 74.5 (CH<sub>2</sub>), 74.2 (CH), 73.1 (CH<sub>2</sub>), 71.8 (CH), 67.7 (CH<sub>2</sub>), 62.2 (CH<sub>2</sub>), 55.6 (CH<sub>3</sub>), 40.5 (CH<sub>2</sub>).

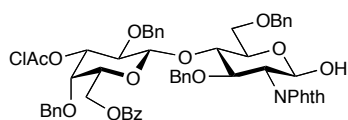

***O*-(6-*O*-Benzoyl-2,4-di-*O*-benzyl-3-chloroacetyl-β-D-galactopyranosyl)-(1→4)-*O*-**

### 3,6-di-*O*-benzyl-2-deoxy-2-phthalimido-D-glucopyranose

To a solution of the *p*-methoxyphenyl ether (78.4 mg, 0.070 mmol) in toluene:acetonitrile:water (1:1.3:1, 10 mL) was added ceric ammonium nitrate (808.8 mg, 1.40 mmol) at room temperature. After the mixture was stirred vigorously for 15 min, the reaction mixture was diluted with EtOAc. The aqueous layer was extracted with EtOAc. The combined organic layers were washed with H<sub>2</sub>O and brine. After drying the extract over MgSO<sub>4</sub>, the solvent was evaporated. The residue was purified by silica gel column chromatography (toluene:EtOAc 5:1 to 4:1) to give 63.9 mg (90%) of the hemiacetal ( $\alpha$ : $\beta$  = 1:4).  $[\alpha]_D^{25} + 60.5$  (*c* 1.1, CHCl<sub>3</sub>);  $\beta$ -isomer: <sup>1</sup>H-NMR (CDCl<sub>3</sub>)  $\delta$  8.00 (2H, d, *J* = 7.3 Hz, Ar-H), 7.83-7.57 (5H, m, Ar-H), 7.53-7.47 (2H, m, Ar-H), 7.42-7.15 (15H, m, Ar-H), 7.04-6.97 (2H, m, Ar-H), 6.85-6.79 (3H, m, Ar-H), 5.31 (1H, d, *J* = 8.5 Hz, H-1a), 4.91 (1H, d, *J* = 12.2 Hz, benzyl), 4.82 (1H, dd, *J* = 10.0, 3.2 Hz, H-3b), 4.78 (1H, d, *J* = 11.7 Hz, benzyl), 4.64 (1H, d, *J* = 12.2 Hz, benzyl), 4.60 (1H, d, *J* = 11.7 Hz, benzyl), 4.57 (2H, d, *J* = 15.6 Hz, benzyl), 4.49 (1H, d, *J* = 12.0 Hz, benzyl), 4.43 (1H, d, *J* = 7.8 Hz, H-1b), 4.41 (1H, dd, *J* = 10.5, 8.5 Hz, H-2a), 4.36 (1H, d, *J* = 12.0 Hz, benzyl), 4.29 (1H, dd, *J* = 11.0, 6.8 Hz, H-6b), 4.23 (1H, dd, *J* = 11.0, 6.3 Hz, H-6b), 4.17-4.07 (3H, m), 3.87 (1H, d, *J* = 2.7 Hz, H-4b), 3.88-3.82 (1H, m), 3.78 (1H, d, *J* = 10.0, 7.8 Hz, H-2b), 3.82-3.75 (1H, m), 3.75 (1H, d, *J* = 14.9 Hz, one of ClCH<sub>2</sub>), 3.69 (1H, d, *J* = 14.9 Hz, one of ClCH<sub>2</sub>), 3.74-3.66 (1H, m), 3.62-3.57 (1H, m, H-5a), 3.53 (1H, dd, *J* = 6.8, 6.3 Hz, H-5b); <sup>13</sup>C-NMR (CDCl<sub>3</sub>)  $\delta$  168.5 (C), 166.8 (C), 166.4 (C), 138.9 (C), 138.4 (C), 138.0 (C), 137.3 (C), 134.2 (CH), 133.6 (CH), 131.8 (C), 130.0 (CH), 129.9 (CH), 129.4 (C), 128.8 (CH), 128.7 (CH), 128.7 (CH), 128.6 (CH), 128.4 (CH), 128.2 (CH), 128.1 (CH), 128.10 (CH), 128.0 (CH), 127.2 (CH), 123.5 (CH), 103.8 (CH), 93.2 (CH), 82.3 (CH), 78.7 (CH), 77.5 (CH), 77.1 (CH), 75.6 (CH<sub>2</sub>), 75.6 (CH<sub>2</sub>), 75.4 (CH<sub>2</sub>), 74.5 (CH), 73.6 (CH<sub>2</sub>), 73.2 (CH), 69.4 (CH), 68.5 (CH<sub>2</sub>), 63.1 (CH<sub>2</sub>), 58.2 (CH<sub>2</sub>), 40.7 (CH<sub>2</sub>).

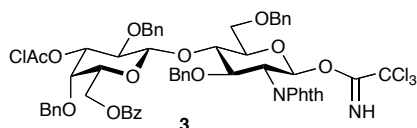

**Trichloroacetimino** ***O*-(6-*O*-benzoyl-2,4-di-*O*-benzyl-3-chloroacetyl- $\beta$ -D-galactopyranosyl)-(1 $\rightarrow$ 4)-*O*-3,6-di-*O*-benzyl-2-deoxy-2-phthalimido-D-glucopyranoside**

To a solution of the hemiacetal (63.9 mg, 0.063 mmol) in 1,2-dichloroethane (1 mL) were added trichloroacetonitrile (44  $\mu$ L, 0.442 mmol) and 1,8-diazabicyclo[5.4.0]-undec-7-ene (0.9  $\mu$ L, 0.006 mmol) at 0 °C under Ar atmosphere. After the mixture was stirred at 0 °C for 1 h, the mixture was purified by silica gel column chromatography (toluene:EtOAc 10:1 to 3:1) to give 63.6 mg (88%) of imidate **3**;  $^1\text{H-NMR}$  ( $\text{CDCl}_3$ )  $\delta$  8.53 (1H, s, NH), 8.04-7.99 (2H, m, Ar-H), 7.76-7.58 (5H, m, Ar-H), 7.52 (2H, t,  $J = 7.8$  Hz, Ar-H), 7.41-7.13 (15H, m, Ar-H), 7.02-6.95 (2H, m, Ar-H), .6.87-6.79 (3H, m, Ar-H), 6.40 (1H, d,  $J = 8.5$  Hz, H-1a), 4.90 (1H, d,  $J = 12.4$  Hz, benzyl), 4.84 (1H, dd,  $J = 11.0, 3.2$  Hz, H-3b), 4.81 (1H, d,  $J = 12.0$  Hz, benzyl), 4.65 (1H, d,  $J = 12.0$  Hz, benzyl), 4.64 (1H, d,  $J = 12.2$  Hz, benzyl), 4.60 (1H, d,  $J = 11.7$  Hz, benzyl), 4.54 (1H, d,  $J = 12.2$  Hz, benzyl), 4.53 (1H, d,  $J = 12.0$  Hz, benzyl), 4.51 (1H, d,  $J = 8.1$  Hz, H-1b), 4.49-4.42 (2H, m), 4.42 (1H, d,  $J = 12.2$  Hz, benzyl), 4.31 (1H, dd,  $J = 11.0, 6.8$  Hz, H-6b), 4.24 (1H, dd,  $J = 11.0, 6.1$  Hz, H-6b), 4.27-4.20 (1H, m), 3.93 (1H, dd,  $J = 11.0, 2.9$  Hz, H-3b), 3.88 (1H, d,  $J = 2.9$  Hz, H-4b), 3.82-3.70 (3H, m), 3.75 (1H, d,  $J = 14.9$  Hz, one of  $\text{ClCH}_2$ ), 3.69 (1H, d,  $J = 14.9$  Hz, one of  $\text{ClCH}_2$ ), 3.55 (1H, dd,  $J = 6.8, 6.1$  Hz, H-5b);  $^{13}\text{C-NMR}$  ( $\text{CDCl}_3$ )  $\delta$  166.6 (C), 165.8 (C), 160.8 (C), 138.5 (C), 138.0 (C), 137.8 (C), 137.6 (C), 133.7 (CH), 133.2 (CH), 131.4 (C), 129.7 (CH), 129.6 (CH), 128.5 (CH), 128.4 (CH), 128.3 (CH), 127.9 (CH), 127.9 (CH), 127.8 (CH), 127.8 (CH), 127.7 (CH), 127.7 (CH), 126.9 (CH), 123.2 (CH), 102.9 (CH), 94.1 (CH), 90.4 (C), 78.0 (CH), 77.3 (CH), 76.8 (CH), 76.6 (CH), 75.9 (CH), 75.2 ( $\text{CH}_2$ ), 75.1 ( $\text{CH}_2$ ), 74.5 ( $\text{CH}_2$ ), 74.3 (CH), 73.2 ( $\text{CH}_2$ ), 71.9 (CH), 67.2 ( $\text{CH}_2$ ), 62.3 ( $\text{CH}_2$ ), 54.6 (CH), 40.5 ( $\text{CH}_2$ ).

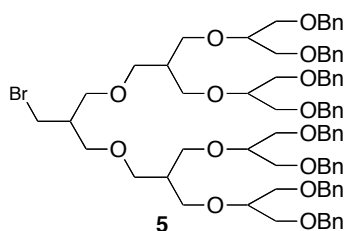

**3-(3-[1,3-bis(benzyloxy)-2-propoxy]-2-[[1,3-bis(benzyloxy)-2-propoxy]methyl]propoxy)-2-(3-[1,3-bis(benzyloxy)-2-propoxy]-2-[[1,3-bis(benzyloxy)-2-propoxy]methyl]propoxy)propyl bromide **5****

To a solution of alcohol **4** (1.00 g, 0.770 mmol) and triphenylphosphine (424.0 mg, 1.62 mmol) in  $\text{CH}_2\text{Cl}_2$  (10 mL) was added *N*-bromosuccinimide (287.7 mg, 1.62 mmol) at 0 °C under Ar atmosphere. The reaction mixture was stirred at room

temperature for 2.5 h. The reaction mixture was poured into EtOAc and H<sub>2</sub>O. The aqueous layer was extracted with EtOAc. The combined organic layers were washed with H<sub>2</sub>O and brine. After drying the extract over MgSO<sub>4</sub>, the solvent was evaporated. The residue was purified by silica gel column chromatography (toluene:EtOAc 15:1 to 10:1 to 5:1) to give **5** (1.033 g, 98%); <sup>1</sup>H-NMR (CDCl<sub>3</sub>) δ 7.33-7.21 (40H, m, Ar-H), 4.49 (16H, s, benzyl), 3.66-3.39 (34H, m), 3.35 (2H, dd, *J* = 9.5, 5.1 Hz), 3.29 (2H, dd, *J* = 9.5, 6.8 Hz), 2.18-2.09 (3H, m); <sup>13</sup>C-NMR (CDCl<sub>3</sub>) δ 138.1 (C), 128.1 (CH), 127.4 (CH), 127.3 (CH), 78.3 (CH), 73.2 (CH<sub>2</sub>), 70.0 (CH<sub>2</sub>), 69.7 (CH<sub>2</sub>), 69.3 (CH<sub>2</sub>), 68.6 (CH<sub>2</sub>), 41.3 (CH), 40.9 (CH), 33.7 (CH<sub>2</sub>).

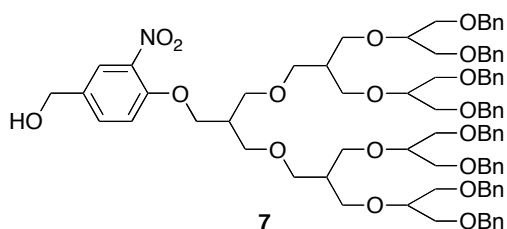

**4-[3-(3-[1,3-bis(benzyloxy)-2-propoxy]-2-[[1,3-bis(benzyloxy)-2-propoxy]methyl]propoxy)-2-(3-[1,3-bis(benzyloxy)-2-propoxy]-2-[[1,3-bis(benzyloxy)-2-propoxy]methyl]propoxy)propoxy]-3-nitrobenzyl alcohol **7****

A mixture of bromide **5** (34.1 mg, 0.025 mmol), 4-hydroxymethyl-2-nitrophenol **6** (8.5 mg, 0.050 mmol), and Cs<sub>2</sub>CO<sub>3</sub> (16.3 mg, 0.050 mmol) in *N,N*-dimethylformamide (0.5 mL) was heated at 80 °C for 10 h under Ar atmosphere. The reaction mixture was poured into EtOAc and H<sub>2</sub>O, and the aqueous layer was extracted with EtOAc. The combined organic layers were washed with H<sub>2</sub>O and brine. After drying the extract over MgSO<sub>4</sub>, the solvent was evaporated. The residue was purified by PLC (toluene:EtOAc 3:1) to give 34.1 mg (94%) of alcohol **7**; <sup>1</sup>H-NMR (CDCl<sub>3</sub>) δ 7.68 (1H, d, *J* = 2.2 Hz, Ar-H), 7.34-7.20 (41H, m, Ar-H), 6.93 (1H, d, *J* = 8.8 Hz, Ar-H), 4.46 (16H, s), 4.40 (2H, s), 4.07 (2H, d, *J* = 5.1 Hz), 3.60-3.37 (36H, m), 2.36-2.25 (1H, m), 2.12 (2H, quint, *J* = 5.9 Hz); <sup>13</sup>C-NMR (CDCl<sub>3</sub>) δ 151.7 (C), 139.1 (C), 138.1 (C), 133.1 (C), 132.5 (CH), 128.1 (CH), 127.4 (CH), 127.4 (CH), 123.9 (CH), 114.4 (CH), 78.3 (CH), 73.2 (CH<sub>2</sub>), 69.9 (CH<sub>2</sub>), 69.4 (CH<sub>2</sub>), 68.8 (CH<sub>2</sub>), 68.6 (CH<sub>2</sub>), 67.3 (CH<sub>2</sub>), 63.6 (CH<sub>2</sub>), 40.9 (CH), 39.8 (CH); Anal. Calcd for C<sub>87</sub>H<sub>103</sub>NO<sub>18</sub>: C 72.03, H 7.16, N 0.97. Found: C 72.00, H 7.22, N 0.94.

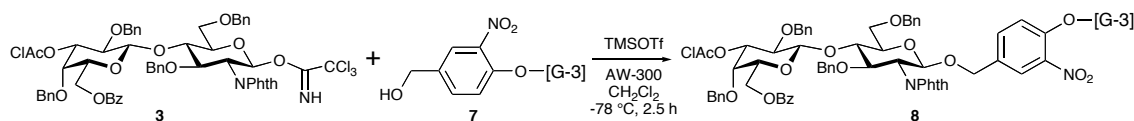

## Synthesis of dendrimer-bound poly(lactosamine)

### Glycosylation reaction

To a mixture of alcohol **7** (80.1 mg, 0.055 mmol), imidate **3** (76.6 mg, 0.066 mmol) and molecular sieves AW-300 (138 mg) in CH<sub>2</sub>Cl<sub>2</sub> (1 mL) was added dropwise a solution of TMSOTf in CH<sub>2</sub>Cl<sub>2</sub> (0.10 mL, 0.009 mmol) at -78 °C under Ar atmosphere. The mixture was stirred at -78 °C for 2.5 h. After removing molecular sieves by filtration, the filtrate was diluted with CH<sub>3</sub>CN (12.5 ml) and transferred to a Millipore stirred cell (with Amicon<sup>®</sup> Ultracell PL Membrane Disk, Molecular Weight Cut-Offs = 1,000). The solution was filtered under 0.4 MPa pressure of nitrogen within 30 min. To the residue, CH<sub>3</sub>CN was added and filtrated twice under 0.4 MPa pressure of nitrogen to give 107.9 mg (80%) of disaccharide **8**.

### Capping reaction

To a solution of the dendrimer-bound lactosamine (107.9 mg, 0.044 mmol) in 1,2-dichloroethane (0.5 mL) was added ethyl isocyanatoformate (5.1 μL, 0.044 mmol) at room temperature under Ar atmosphere. The mixture was stirred at room temperature for 1 h. The mixture was transferred to a Millipore stirred cell (with Amicon<sup>®</sup> Ultracell PL Membrane Disk, MWCO = 1,000) with CH<sub>3</sub>CN (10 mL). The solution was filtered under 0.4 MPa pressure of nitrogen within 15 min to give 104.1 mg (96%) of the product.

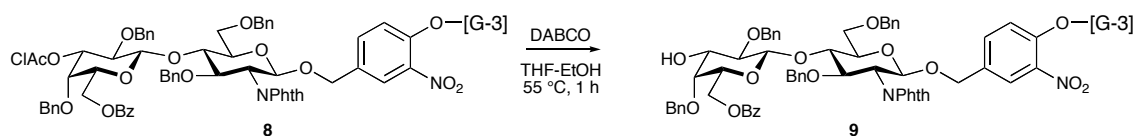

### Deprotection of chloroacetyl ester

A mixture of the chloroacetyl ester (104.0 mg, 0.043 mmol) and DABCO (71.6 mg, 0.638 mmol) in THF (0.4 mL) and EtOH (1 mL) was stirred at 55 °C for 1 h. The mixture was stirred at room temperature for 1 h. The mixture was transferred to a Millipore stirred cell (with Amicon<sup>®</sup> Ultracell PL Membrane Disk, MWCO = 1,000) with CH<sub>3</sub>CN (10 mL). The solution was filtered under 0.4 MPa pressure of nitrogen

within 60 min to give 104.1 mg (96%) of the product. The residue was diluted with CH<sub>3</sub>CN (10 mL) and filtrated within 25 min to give 97.2 mg (97%) of alcohol **9**.

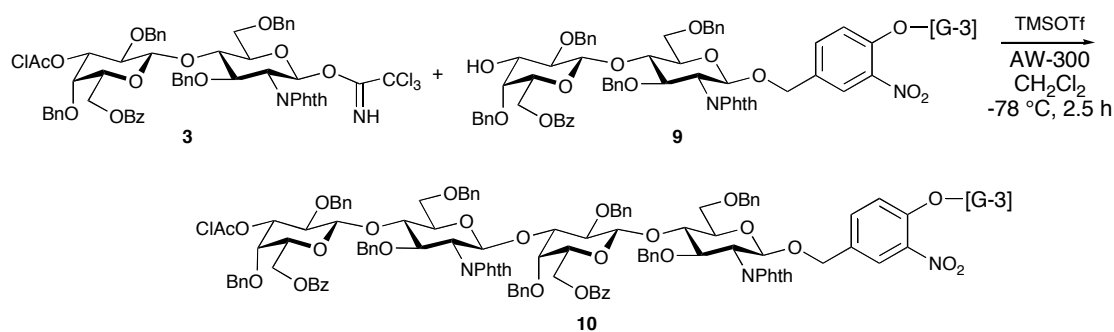

### Synthesis of dendrimer-bound tetrasaccharide **10**

To a mixture of the alcohol **9** (97.2 mg, 0.041 mmol), imidate **3** (61.7 mg, 0.053 mmol) and molecular sieves AW-300 (138 mg) in CH<sub>2</sub>Cl<sub>2</sub> (1 mL) was added dropwise a solution of TMSOTf in CH<sub>2</sub>Cl<sub>2</sub> (0.10 mL, 0.006 mmol) at -78 °C under Ar atmosphere. The mixture was stirred at -78 °C for 4 h. After removing molecular sieves by filtration, the filtrate was diluted with CH<sub>3</sub>CN (12.5 mL) and transferred to a Millipore stirred cell (with Amicon<sup>®</sup> Ultracell PL Membrane Disk, Molecular Weight Cut-Offs = 1,000). The solution was filtered under 0.4 MPa pressure of nitrogen within 25 min. To the residue, CH<sub>3</sub>CN (12 mL) was added and filtrated twice under 0.4 MPa pressure of nitrogen to give 137.9 mg (quant.) of the tetrasaccharide **10**.

### The capping reaction after glycosylation

To a solution of the dendrimer-bound lactosamine (137.9 mg, 0.041 mmol) in 1,2-dichloroethane (0.5 mL) was added ethyl isocyanatoformate (4.2 μL, 0.041 mmol) at room temperature under Ar atmosphere. The mixture was stirred at room temperature for 1 h. The mixture was transferred to a Millipore stirred cell (with Amicon<sup>®</sup> Ultracell PL Membrane Disk, MWCO = 1,000) with CH<sub>3</sub>CN (10 mL). The solution was filtered under 0.4 MPa pressure of nitrogen to within 20 min to give 135.9 mg (99%) of the product.



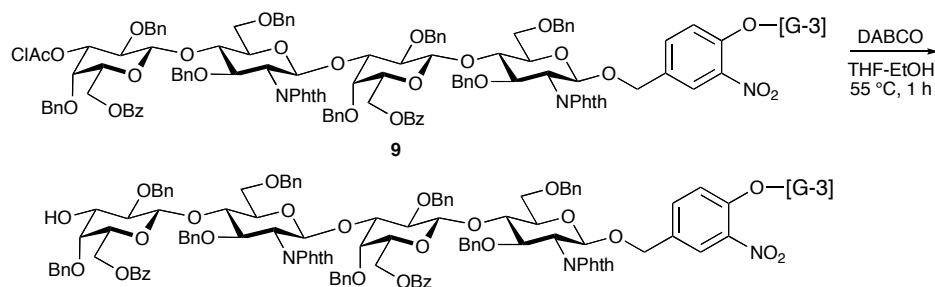

### Deprotection of chloroacetyl ester

A mixture of the chloroacetyl ester **9** (135.9 mg, 0.040 mmol) and DABCO (22.7 mg, 0.202 mmol) in THF (0.3 mL) and EtOH (1 mL) was stirred at 55 °C for 1 h. The mixture was transferred to a Millipore stirred cell (with Amicon<sup>®</sup> Ultracell PL Membrane Disk, MWCO = 1,000) with CH<sub>3</sub>CN (20 mL). The solution was filtered under 0.4 MPa pressure of nitrogen within 65 min. The residue was diluted with CH<sub>3</sub>CN (10 mL) and filtrated within 25 min to give 133.2 mg (quant.) of the product.

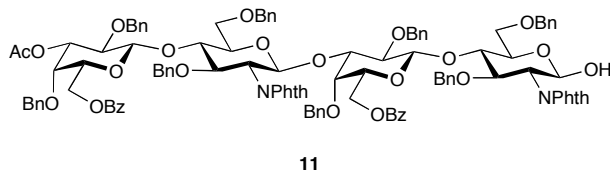

A solution of dendrimer-bound tetrasaccharide **10** (53 mg, 0.0167 mmol) in CH<sub>2</sub>Cl<sub>2</sub> (2 mL) and EtOH (2 mL), was added Mo(CO<sub>2</sub>)<sub>6</sub> (44 mg, 0.167 mmol) and the whole mixture was refluxed for 6 h under Ar atmosphere. After cooling the mixture, the mixture was diluted with CHCl<sub>3</sub> and sat. NaHCO<sub>3</sub>. After separation, the aqueous layer was extracted with CHCl<sub>3</sub>. The combined layers were washed with brine. After drying the extract over Na<sub>2</sub>SO<sub>4</sub>, the solvent was evaporated. The crude aniline was dissolved in pyridine (2 mL) then Ac<sub>2</sub>O (1 mL) was added. After overnight, the solvent was evaporated, and the residue was dried *in vacuo*. The residue was dissolved in 15% TFA in CH<sub>2</sub>Cl<sub>2</sub> (3 mL). After 4h, the mixture was concentrated, co-evaporated with toluene. The residue was purified by silica gel column chromatography (hexane/EtOAc 7:3-1:1) to give 27 mg (84%) of the tetrasaccharide **11**. [ $\alpha$ ]<sub>D</sub> +36 (*c* 1.0, CHCl<sub>3</sub>); for major peak; <sup>1</sup>H-NMR (CDCl<sub>3</sub>)  $\delta$ : 7.91-7.88 (m, 3H), 7.6-6.7 (m, 55H), 5.32 (d, *J* = 8.4 Hz, 1H), 5.05 (t, *J* = 8.5 Hz, 1H), 4.94 (d, *J* = 11.7 Hz, 1H), 4.86 (d, *J* = 12.2 Hz, 1H), 4.8-4.7 (m, 15H), 4.64 (d, *J* = 11.5 Hz, 1H), 4.58 (d, *J* = 11.7 Hz, 1H), 4.47-3.30 (m, 22H), 4.32 (t, *J* = 12.0 Hz, 1H), 3.15 (d, *J* = 10.7 Hz, 1H), 3.08 (d, *J* = 10.7 Hz, 1H), 2.76 (d, *J* = 8.8 Hz,

1H), 1.92 (s, 3H); <sup>13</sup>C-NMR (CDCl<sub>3</sub>) 170.4, 168.1, 166.2, 166.0, 138.9, 138.9, 138.8, 138.4, 138.2, 138.0, 133.5, 133.3, 133.2, 131.8, 130.1, 129.9, 129.8, 129.2, 128.6, 128.6, 128.5, 128.4, 128.3, 128.2, 128.0, 128.0, 127.9, 127.8, 127.7, 127.6, 127.5, 127.0, 127.0, 126.6, 123.4, 123.2, 103.4, 103.1, 100.1, 93.2, 82.2, 79.0, 78.1, 77.8, 76.7, 76.5, 75.6, 75.5, 75.3, 75.1, 75.0, 74.6, 74.5, 74.4, 73.4, 72.2, 72.1, 68.5, 67.5, 63.4, 62.5, 67/9, 56.7, 30.1, 21.4.

E:\Deki\au\_2\_056\_1.als

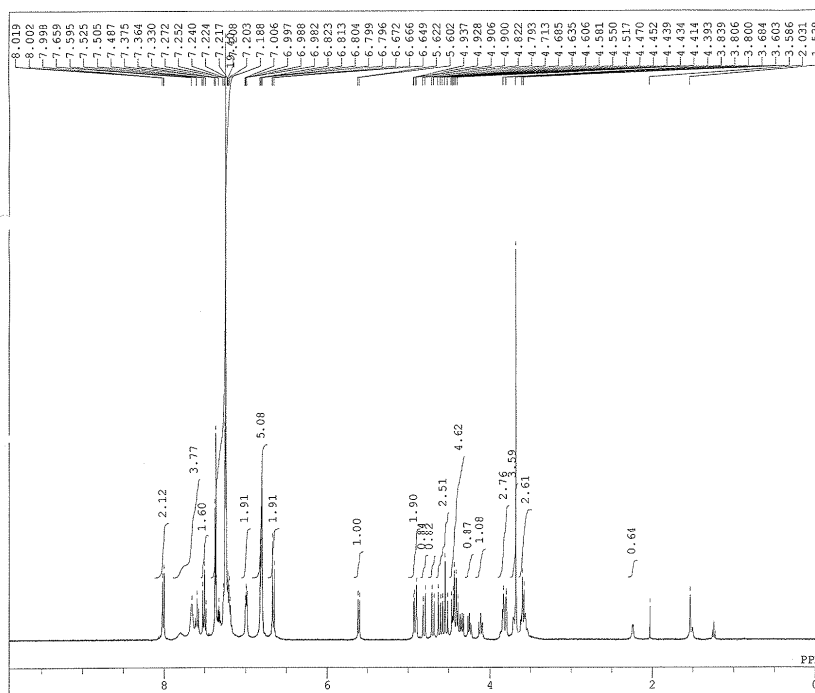

DFILE E:\Deki\au\_2\_056\_1.als  
COMNT  
DATIM Fri Mar 05 10:59:33 2004  
OBNUC 1H  
EXMOD NON  
OBFRQ 399.65 MHz  
OBSET 124.00 KHz  
OBFIN 10500.0 Hz  
POINT 32768  
FREQU 7993.6 Hz  
SCANS 16  
ACQTM 4.039 sec  
PD 2.901 sec  
PWL 5.2 us  
IRNUC 1H  
CTEMP 22.4 c  
SLVNT CDCL3  
EXREF 7.24 ppm  
BF 0.12 Hz  
RGAIN 20

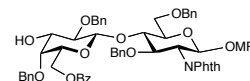

E:\Deki\au\_4\_151\Auto1BCM\_E2\_FT.als  
au 4 151

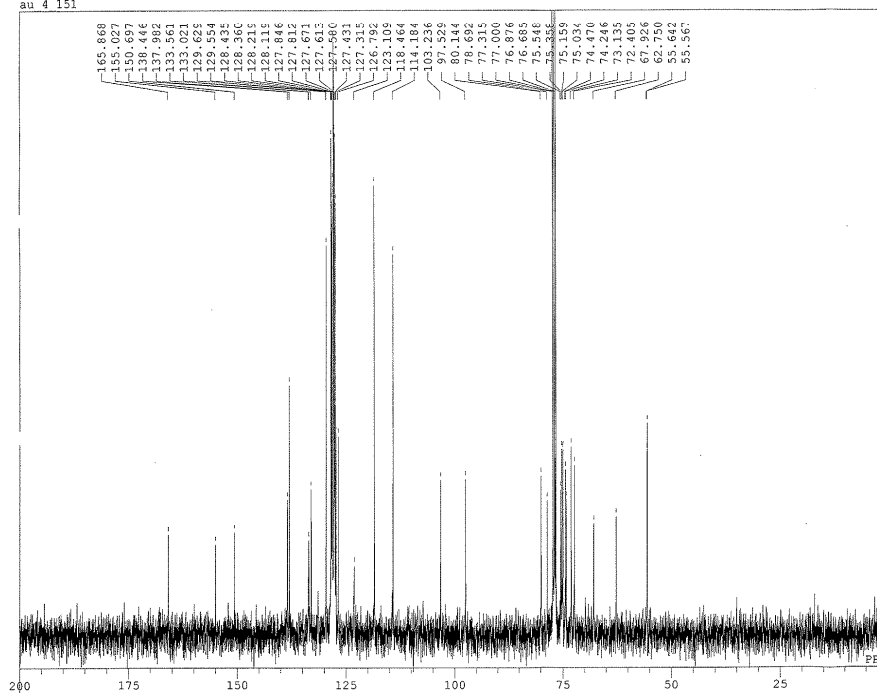

DFILE E:\Deki\au\_4\_151\Auto1  
COMNT au 4 151  
DATIM Fri Apr 22 11:23:15 20  
OBNUC 13C  
EXMOD BCM  
OBFRQ 100.40 MHz  
OBSET 125.00 KHz  
OBFIN 10500.0 Hz  
POINT 32760  
FREQU 27322.4 Hz  
SCANS 96  
ACQTM 1.199 sec  
PD 1.794 sec  
PWL 4.6 us  
IRNUC 1H  
CTEMP 23.7 c  
SLVNT CDCL3  
EXREF 77.00 ppm  
BF 1.20 Hz  
RGAIN 24

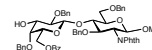

E:\Ueki\au\_2\_063\_1.als

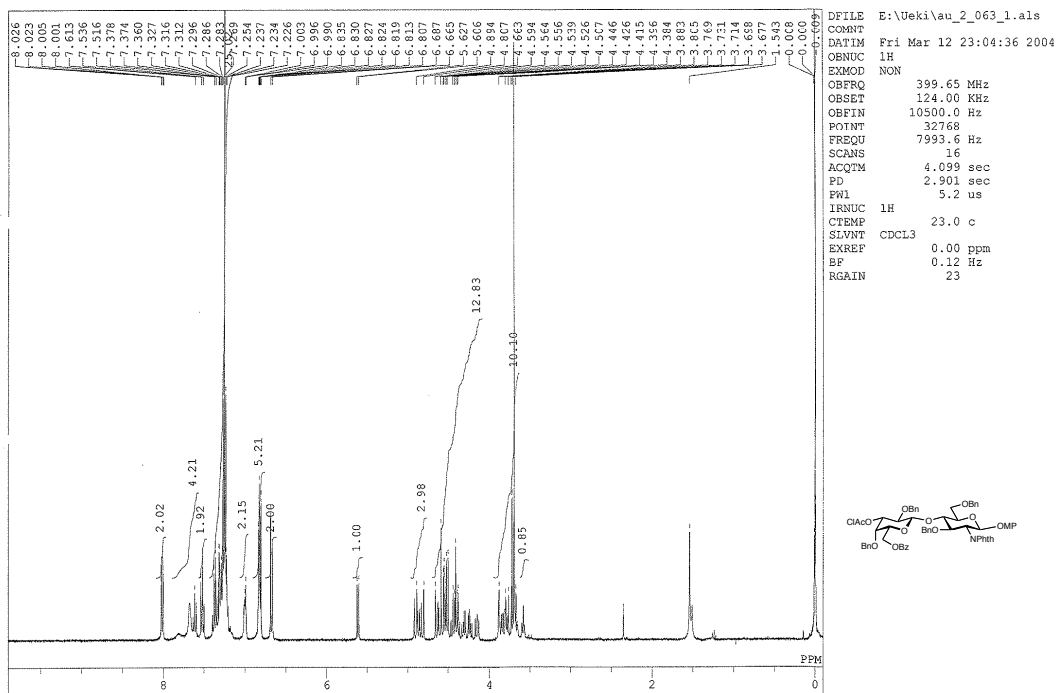

E:\Ueki\au\_4\_157\Auto1BCM\_E1\_FT.als  
 au 4 157

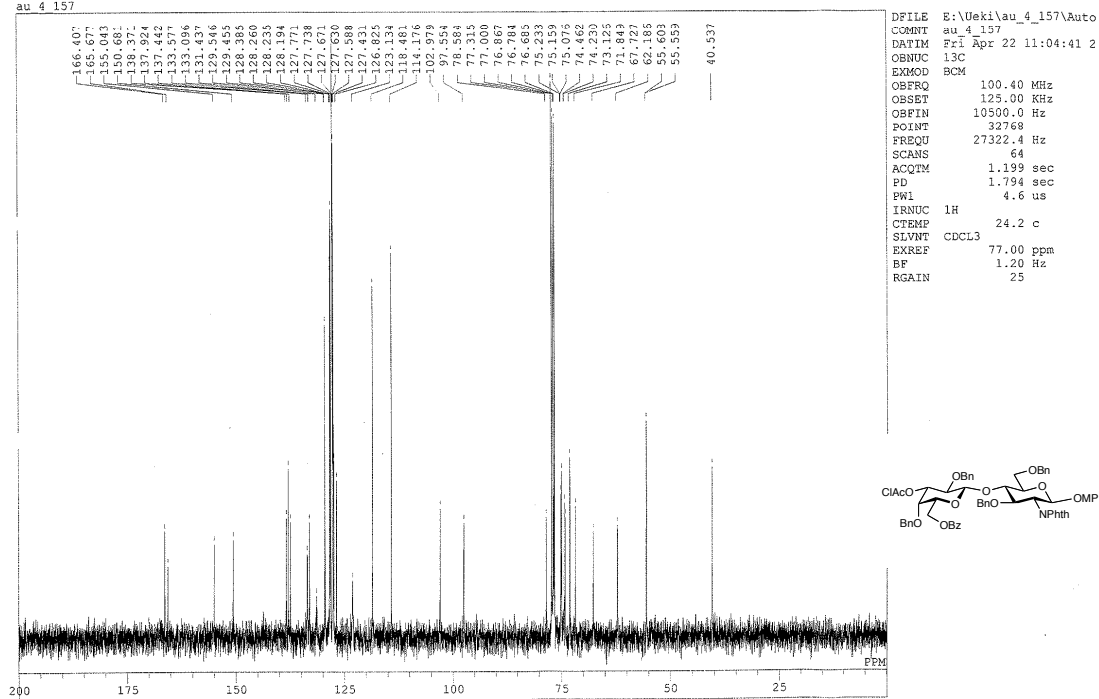

E:\Ueki\au\_2\_076\_1.als

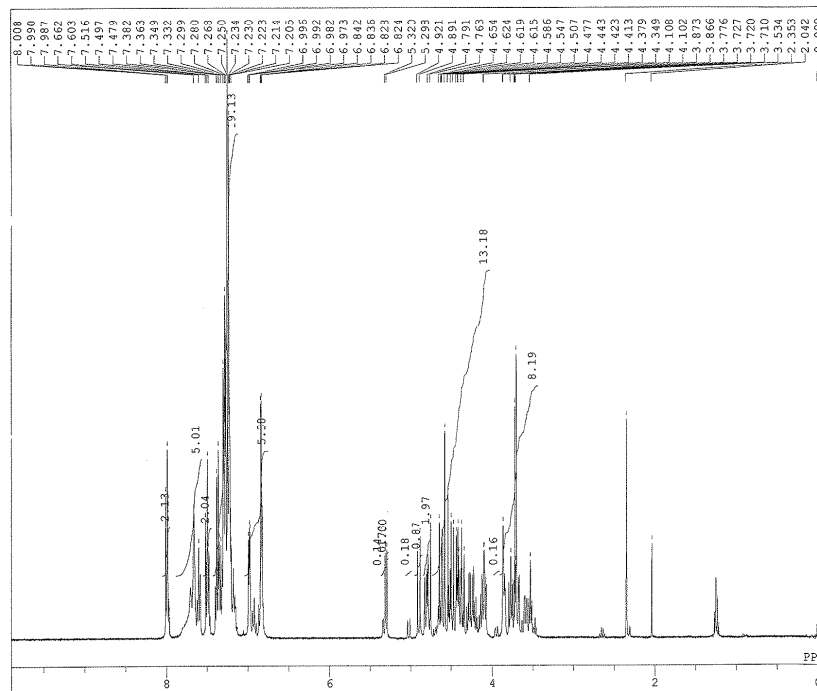

DFILE E:\Ueki\au\_2\_076\_1.als  
COMNT  
DATIM Mon Mar 22 11:05:37 2004  
OBNUC 1H  
EXMOD NON  
OBFRQ 399.65 MHz  
OBSET 124.00 KHz  
OBFIN 10500.0 Hz  
POINT 32768  
FREQU 7993.6 Hz  
SCANS 8  
ACQTM 4.099 sec  
PD 2.901 sec  
PWI 5.2 us  
IRNUC 1H  
CTEMP 23.1 c  
SLVNT CDCL3  
EKREF 0.00 ppm  
BF 0.12 Hz  
RGAIN 14

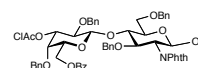

E:\Ueki\hemiacetal\hemiacetal.ALS

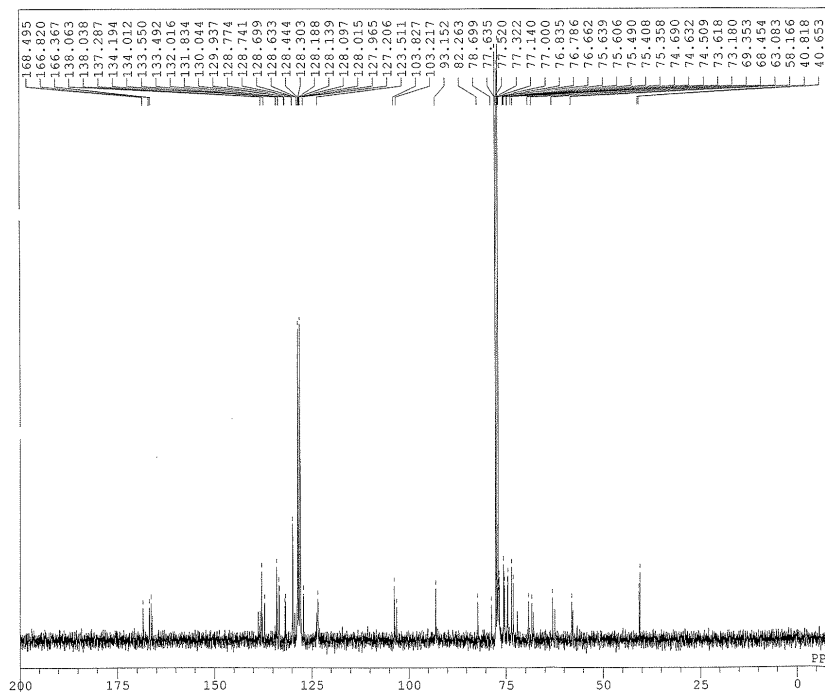

DFILE E:\Ueki\hemiacetal\hemiacetal.ALS  
COMNT  
DATIM Thu Jun 30 20:53:03 2005  
OBNUC 13C  
EXMOD BCM  
OBFRQ 100.40 MHz  
OBSET 125.00 KHz  
OBFIN 10500.0 Hz  
POINT 32768  
FREQU 27173.9 Hz  
SCANS 384  
ACQTM 1.206 sec  
PD 1.794 sec  
PWI 4.6 us  
IRNUC 1H  
CTEMP 24.3 c  
SLVNT CDCL3  
EKREF 77.00 ppm  
BF 1.20 Hz  
RGAIN 26

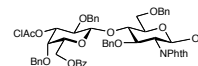

E:\Ueki\au\_2\_078\_1.als

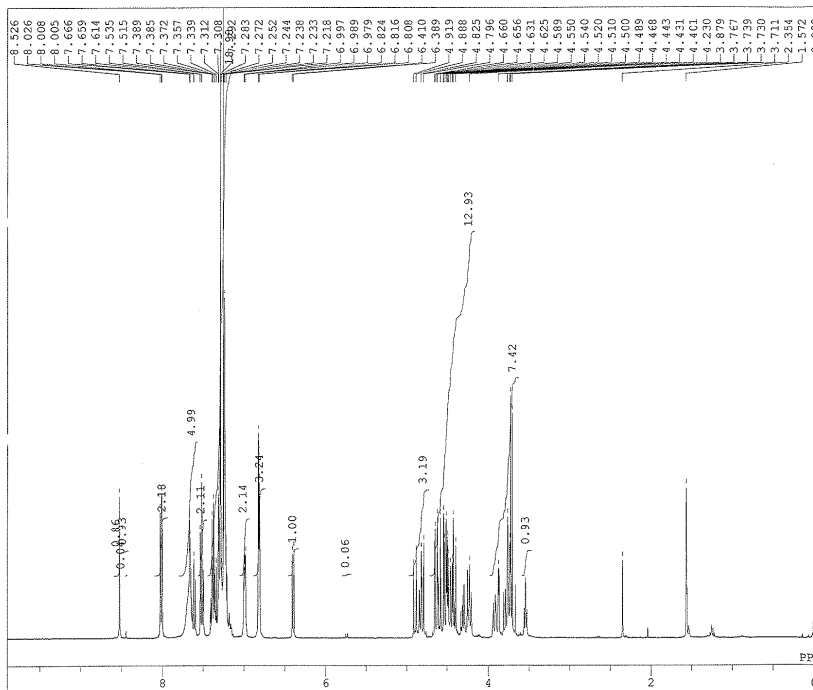

DFILE E:\Ueki\au\_2\_078\_1.als  
 COMPT  
 DATIM Mon Mar 22 22:23:46 2004  
 OBNUC 1H  
 EXMOD NON  
 OBFREQ 399.65 MHz  
 OBSET 124.00 KHz  
 OBFIN 10500.0 Hz  
 POINT 32768  
 FREQU 7993.6 Hz  
 SCANS 32  
 ACQTM 4.039 sec  
 PD 2.901 sec  
 PW1 5.2 us  
 IRNUC 1H  
 CTEMP 22.7 c  
 SLVNT CDCL3  
 EXREF 0.00 ppm  
 BF 0.12 Hz  
 RGAIN 18

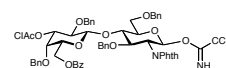

E:\Ueki\imide\imide\_13C.ALS

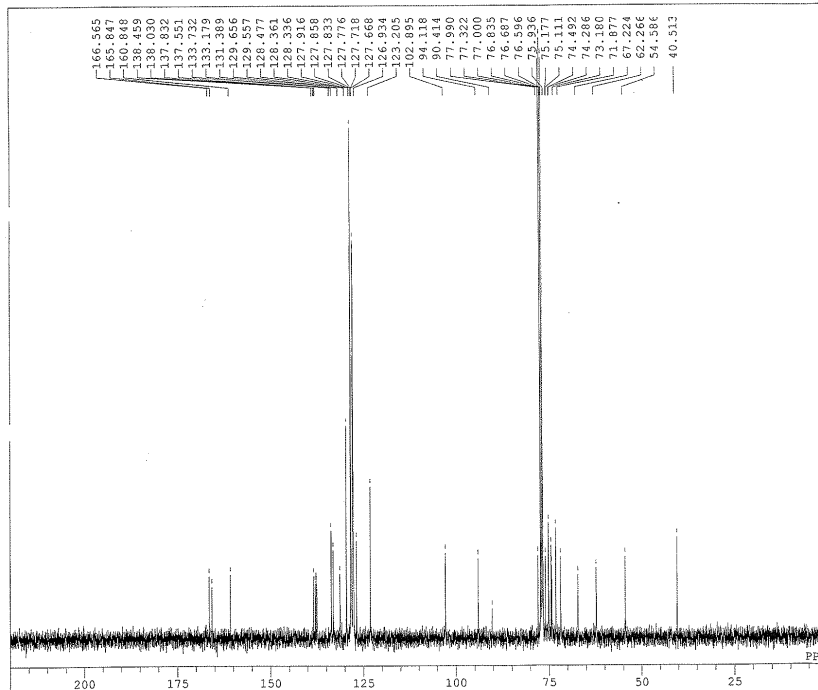

DFILE E:\Ueki\imide\imide\_13C.A  
 COMPT  
 DATIM Sat May 07 21:07:15 2005  
 OBNUC 13C  
 EXMOD BCM  
 OBFREQ 100.40 MHz  
 OBSET 125.00 KHz  
 OBFIN 10500.0 Hz  
 POINT 32768  
 FREQU 27173.9 Hz  
 SCANS 384  
 ACQTM 1.206 sec  
 PD 1.794 sec  
 PW1 4.6 us  
 IRNUC 1H  
 CTEMP 24.5 c  
 SLVNT CDCL3  
 EXREF 77.00 ppm  
 BF 1.20 Hz  
 RGAIN 26

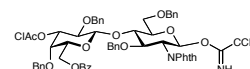

E:\Ueki\au\_4\_069\_1.als

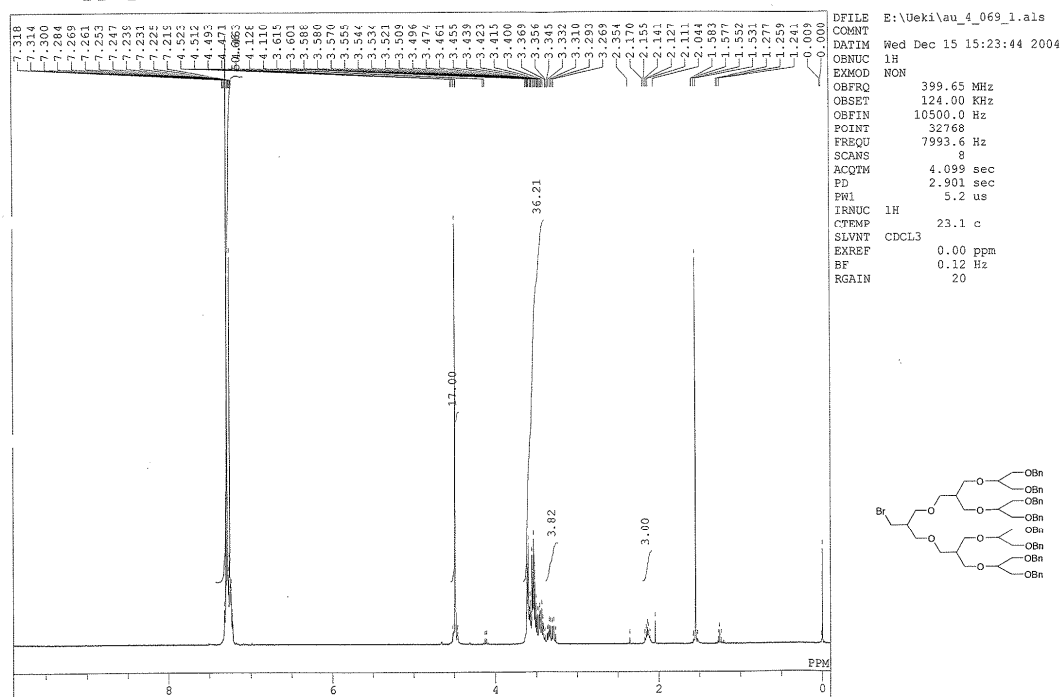

C:\WINNMR98\TEMPDATA\Auto1BCM\_E1\_FT.als  
 au 4\_069

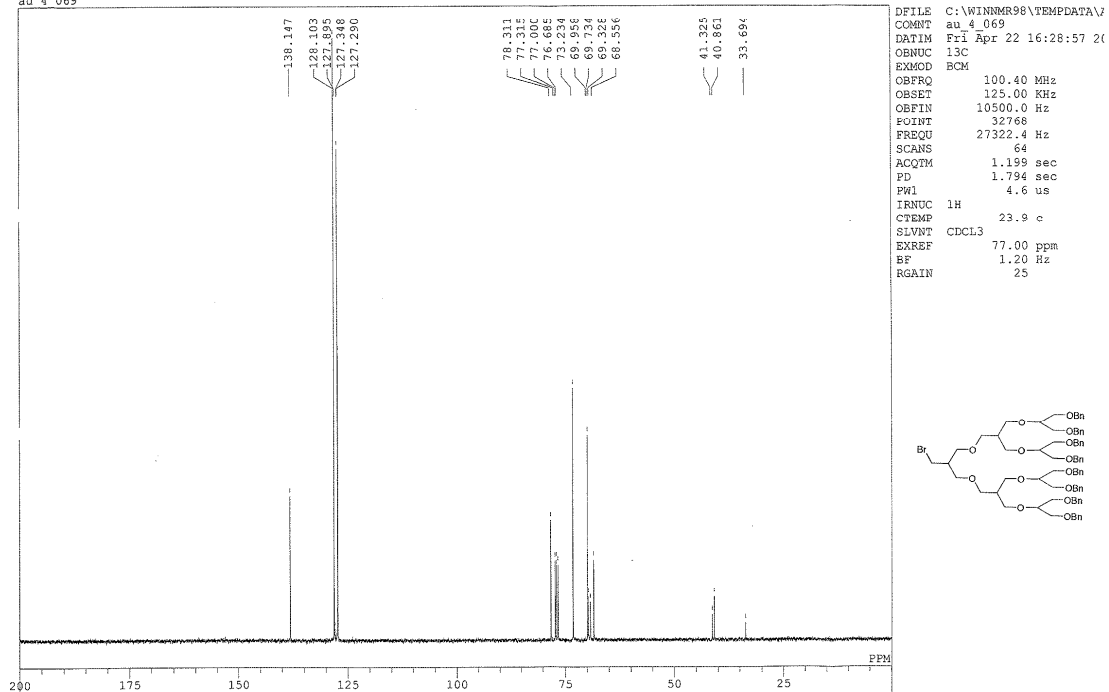

E:\Ueki\au\_5\_029\au\_5\_029\_1.ALS

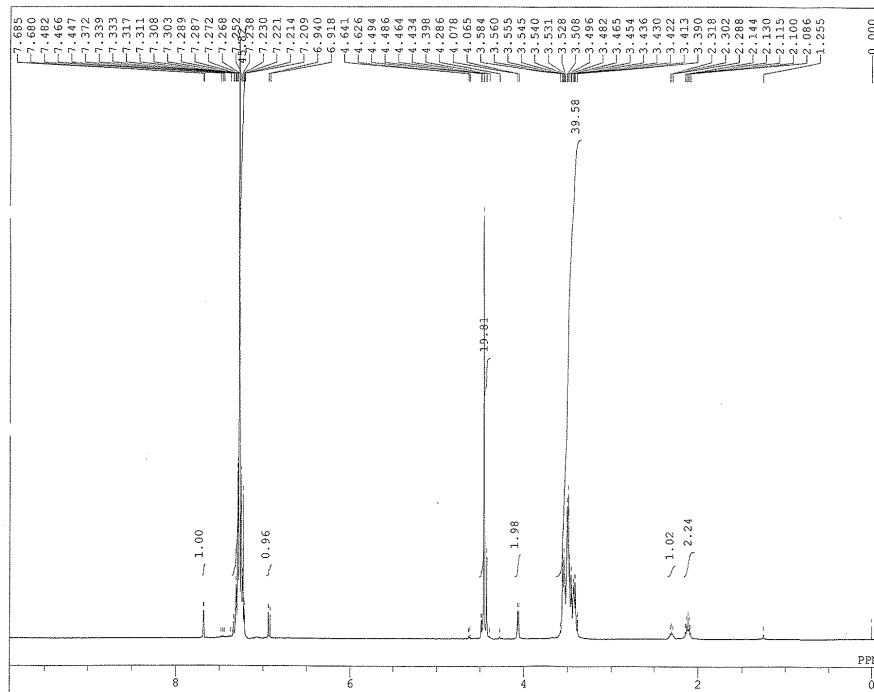

DFILE E:\Ueki\au\_5\_029\au\_5\_029\_1.ALS  
 COMNT  
 DATIM Mon Apr 25 11:56:41 2007  
 OBNUC 1H  
 EXMOD NON  
 OBFRQ 399.65 MHz  
 OBSET 124.00 KHz  
 OBFTN 10500.0 Hz  
 POINT 32768  
 FREQU 7993.6 Hz  
 SCANS 8  
 ACQTM 4.099 sec  
 PD 2.901 sec  
 PW1 5.2 us  
 IRNUC 1H  
 CTEMP 24.3 c  
 SLVNT CDCL3  
 EXREF 0.00 ppm  
 BF 0.12 Hz  
 RGAIN 11

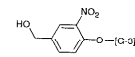

C:\WINMR98\TEMPDATA\AutolBCM\_E1\_FT.als

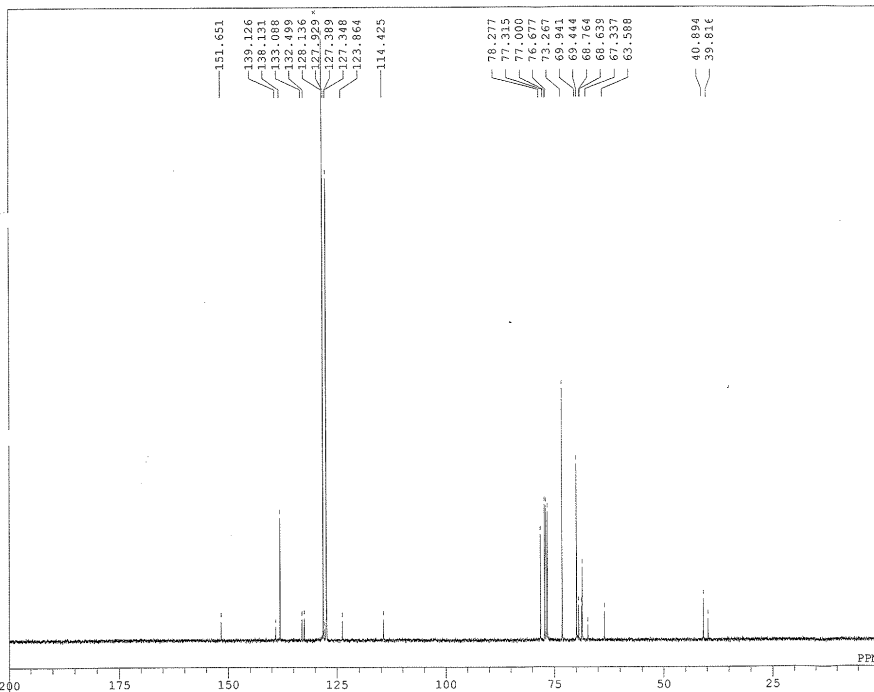

DFILE C:\WINMR98\TEMPDATA\AutolBCM\_E1\_FT.als  
 COMNT  
 DATIM Mon Apr 25 12:14:59 2007  
 OBNUC 13C  
 EXMOD BCM  
 OBFRQ 100.40 MHz  
 OBSET 125.00 KHz  
 OBFTN 10500.0 Hz  
 POINT 32768  
 FREQU 27322.4 Hz  
 SCANS 256  
 ACQTM 1.199 sec  
 PD 1.794 sec  
 PW1 4.6 us  
 IRNUC 13C  
 CTEMP 23.7 c  
 SLVNT CDCL3  
 EXREF 77.00 ppm  
 BF 1.20 Hz  
 RGAIN 25

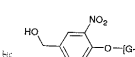



E:\Ueki\au\_4\_083\au\_4\_083\_crude.ALS

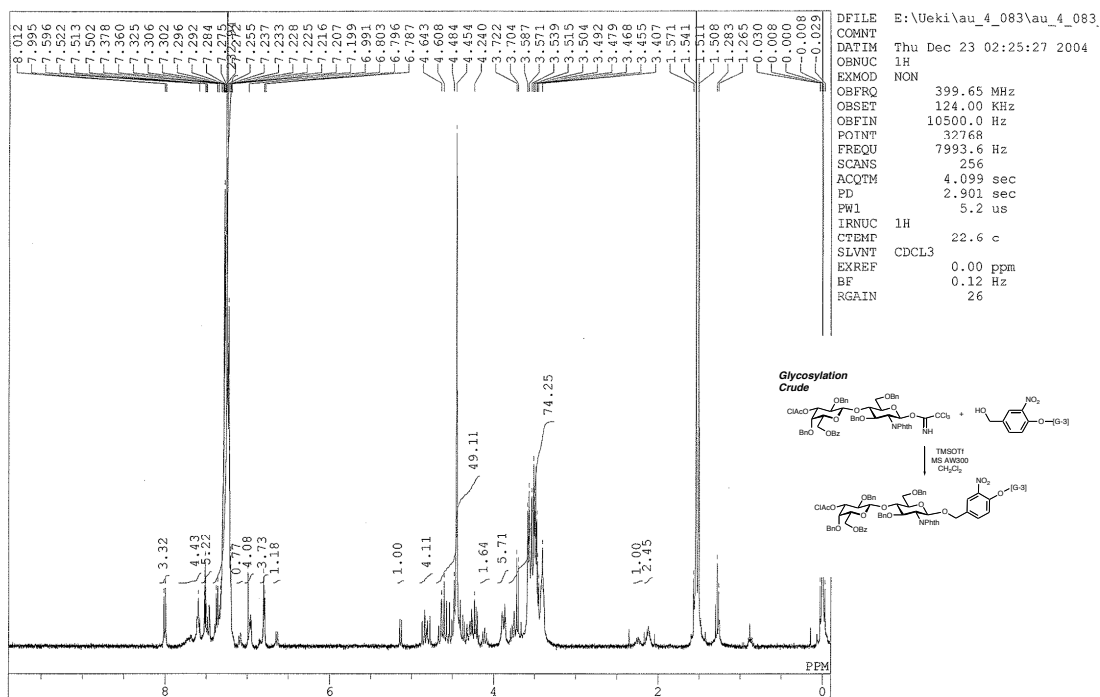

E:\Ueki\au\_4\_083\au\_4\_083\_1.ALS

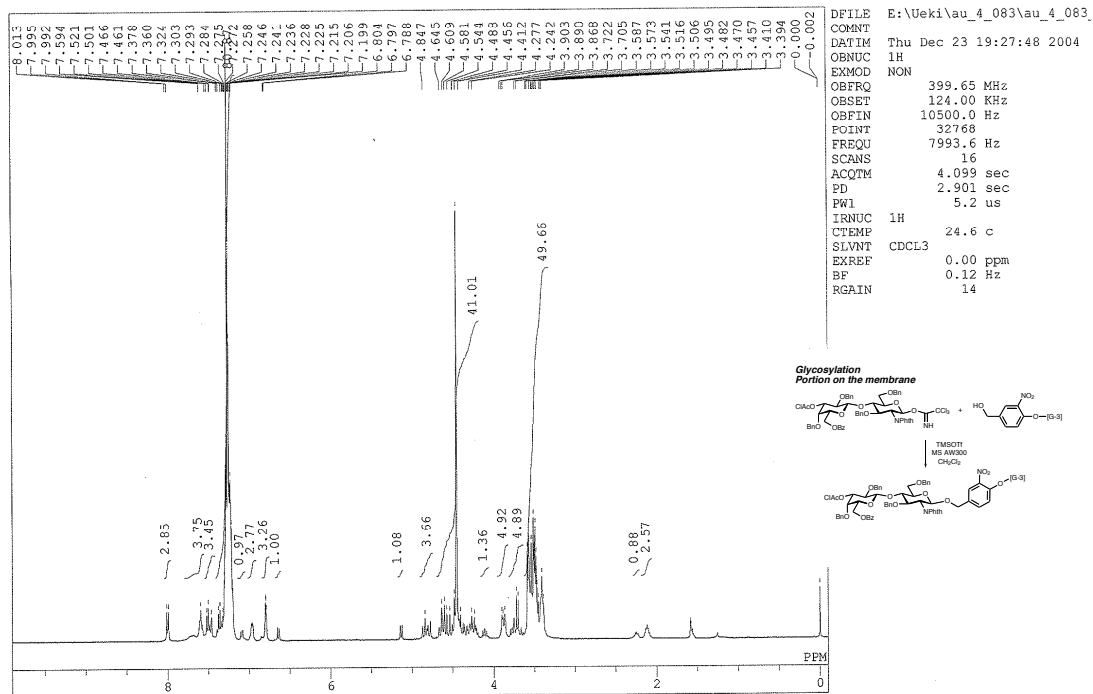

E:\Ueki\au\_4\_085\au\_4\_085\_crude.ALS

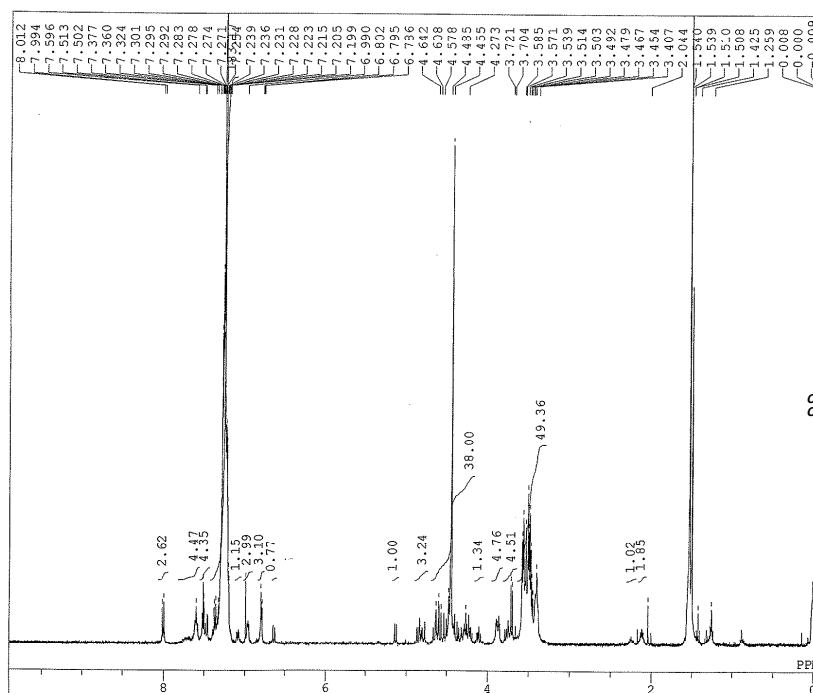

DFILE E:\Ueki\au\_4\_085\au\_4\_085\_...  
 COMMT  
 DATIM Fri Dec 24 18:32:18 2004  
 OBNUC 1H  
 EXMOD NON  
 OBFREQ 399.65 MHz  
 OBSET 124.00 KHz  
 OBFIN 10500.0 Hz  
 POINT 32768  
 FREQU 7993.6 Hz  
 SCANS 196  
 ACQTM 4.099 sec  
 PD 2.901 sec  
 PW1 5.2 us  
 IRNUC 1H  
 CTEMP 22.6 c  
 SLVNT CDCL3  
 EXREF 0.00 ppm  
 BF 0.12 Hz  
 RGAIN 26

**Capping reaction  
 Crude**

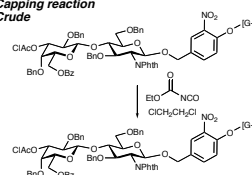

E:\Ueki\au\_4\_085\au\_4\_085\_1.ALS

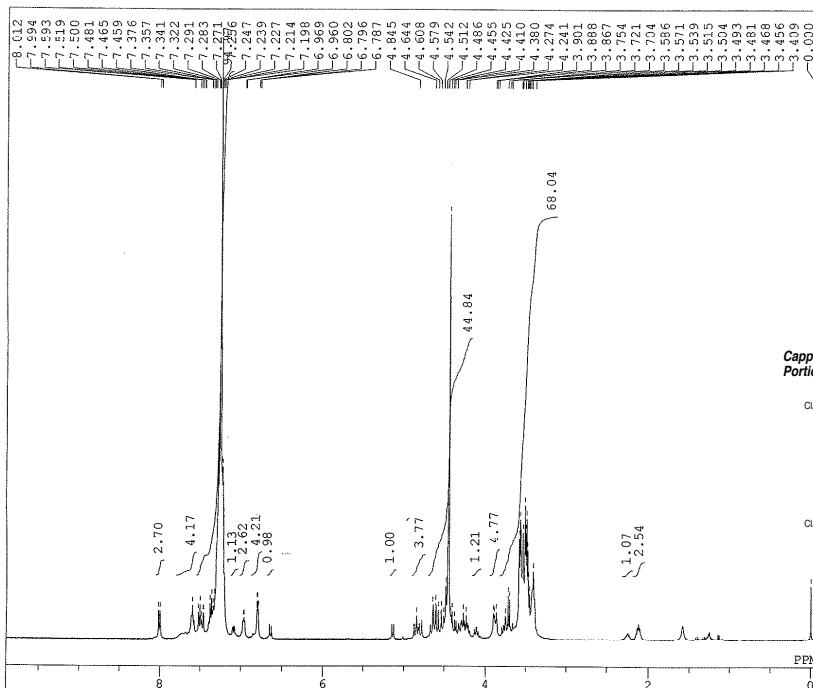

DFILE E:\Ueki\au\_4\_085\au\_4\_085\_...  
 COMMT  
 DATIM Fri Dec 24 19:49:54 2004  
 OBNUC 1H  
 EXMOD NON  
 OBFREQ 399.65 MHz  
 OBSET 124.00 KHz  
 OBFIN 10500.0 Hz  
 POINT 32768  
 FREQU 7993.6 Hz  
 SCANS 16  
 ACQTM 4.099 sec  
 PD 2.901 sec  
 PW1 5.2 us  
 IRNUC 1H  
 CTEMP 24.2 c  
 SLVNT CDCL3  
 EXREF 0.00 ppm  
 BF 0.12 Hz  
 RGAIN 14

**Capping reaction  
 Portion on the membrane**

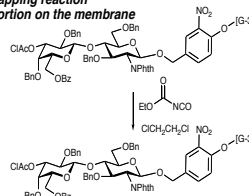

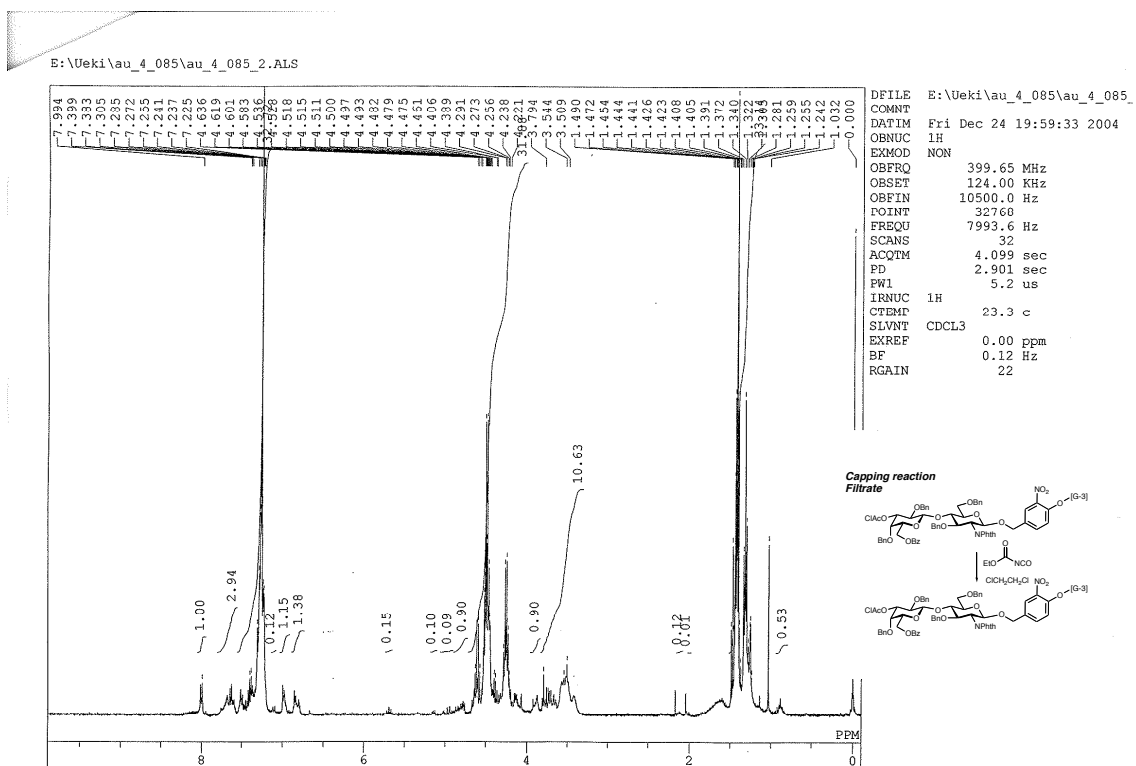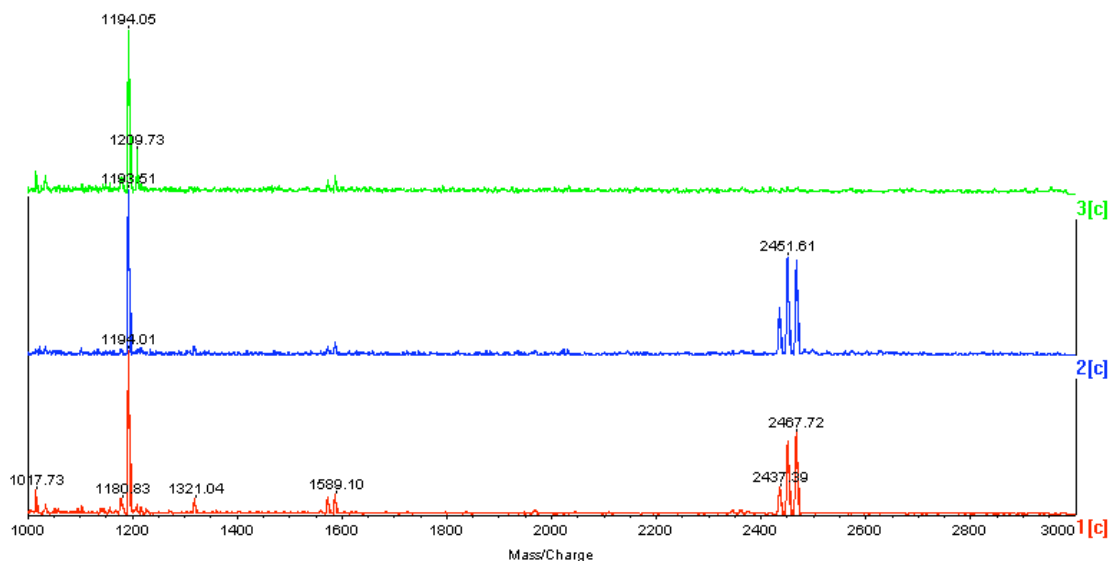

MS spectra for capping reaction; the bottom (red) spectrum is for crude mixture, the middle (blue) spectrum is for portion left on the membrane, and the upper (green) spectrum is for filtrate.





C:\WINNMR98\TEMPDATA\Auto1NON\_E1.ALS  
 au 4\_090\_crude

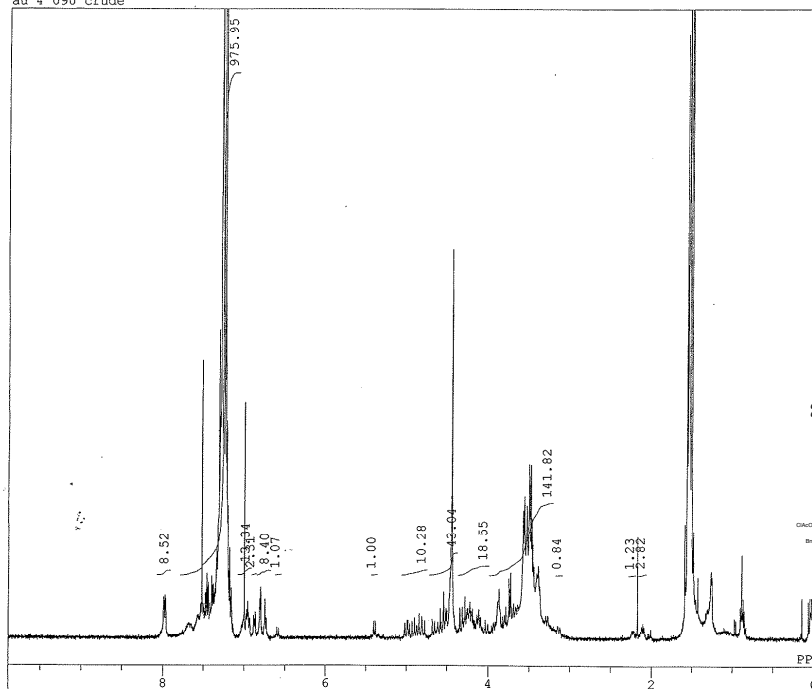

DFILE C:\WINNMR98\TEMPDATA\Auto1  
 COMNT au\_4\_090\_crude  
 DATIM Tue Dec 28 08:57:03 2004  
 OBNUC 1H  
 EXMOD NON  
 OBFREQ 399.65 MHz  
 OBSSET 124.00 KHz  
 OBFIN 10500.0 Hz  
 POINT 32768  
 FREQU 8000.0 Hz  
 SCANS 4096  
 ACQTM 4.096 sec  
 PD 2.901 sec  
 PW1 5.2 us  
 IRNUC 1H  
 CTEMP 22.3 c  
 SLVNT CDCL3  
 EXREF 0.00 ppm  
 BF 0.12 Hz  
 RGAIN 26

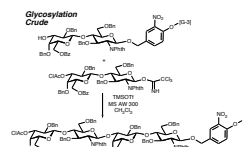

E:\Ueki\au\_4\_090\au\_4\_090\_1.ALS

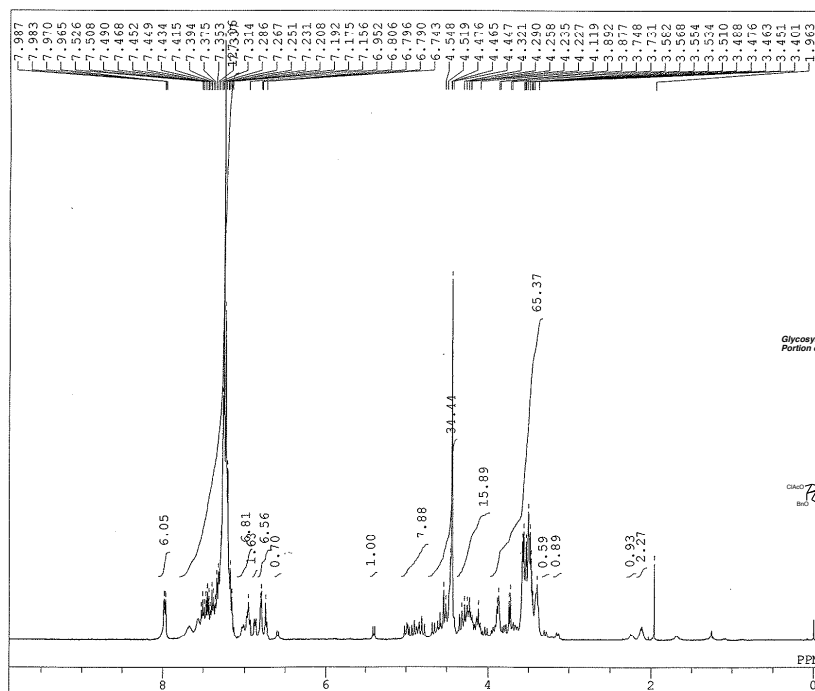

DFILE E:\Ueki\au\_4\_090\au\_4\_090\_1  
 COMNT au\_4\_090\_1  
 DATIM Tue Dec 28 00:39:35 2004  
 OBNUC 1H  
 EXMOD NON  
 OBFREQ 399.65 MHz  
 OBSSET 124.00 KHz  
 OBFIN 10500.0 Hz  
 POINT 32768  
 FREQU 7993.6 Hz  
 SCANS 32  
 ACQTM 4.099 sec  
 PD 2.901 sec  
 PW1 5.2 us  
 IRNUC 1H  
 CTEMP 23.2 c  
 SLVNT CDCL3  
 EXREF 0.00 ppm  
 BF 0.12 Hz  
 RGAIN 11

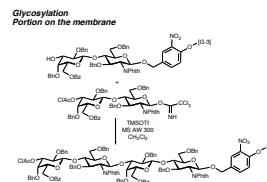

E:\Ueki\au\_4\_090\au\_4\_090\_2.ALS

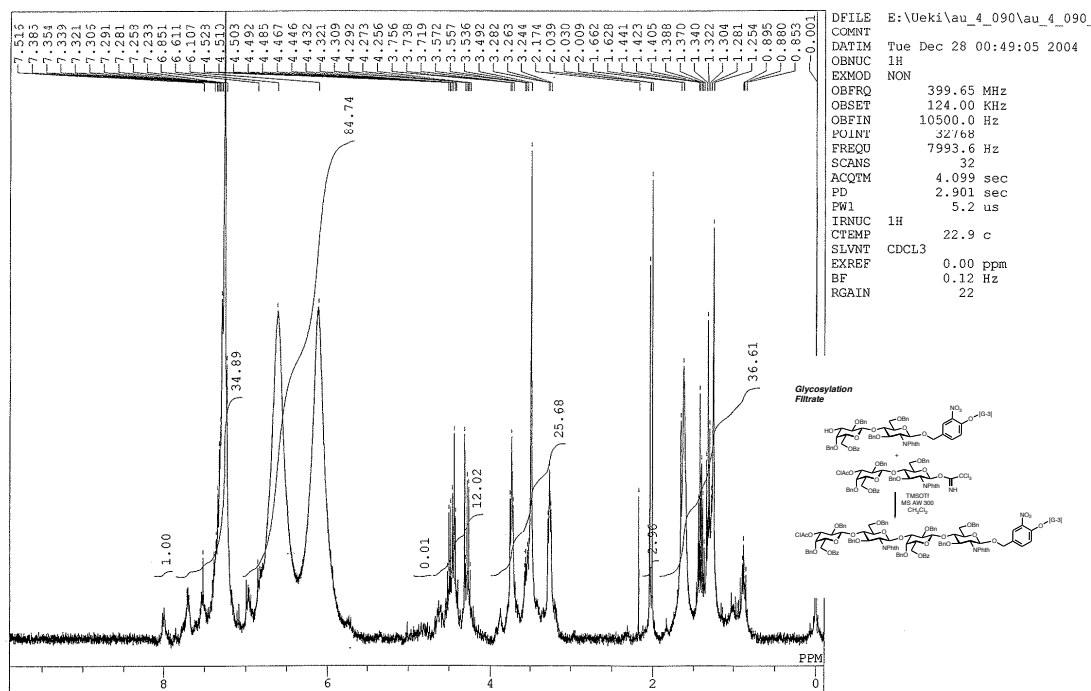

E:\Ueki\au\_4\_094\au\_4\_094\_2.ALS

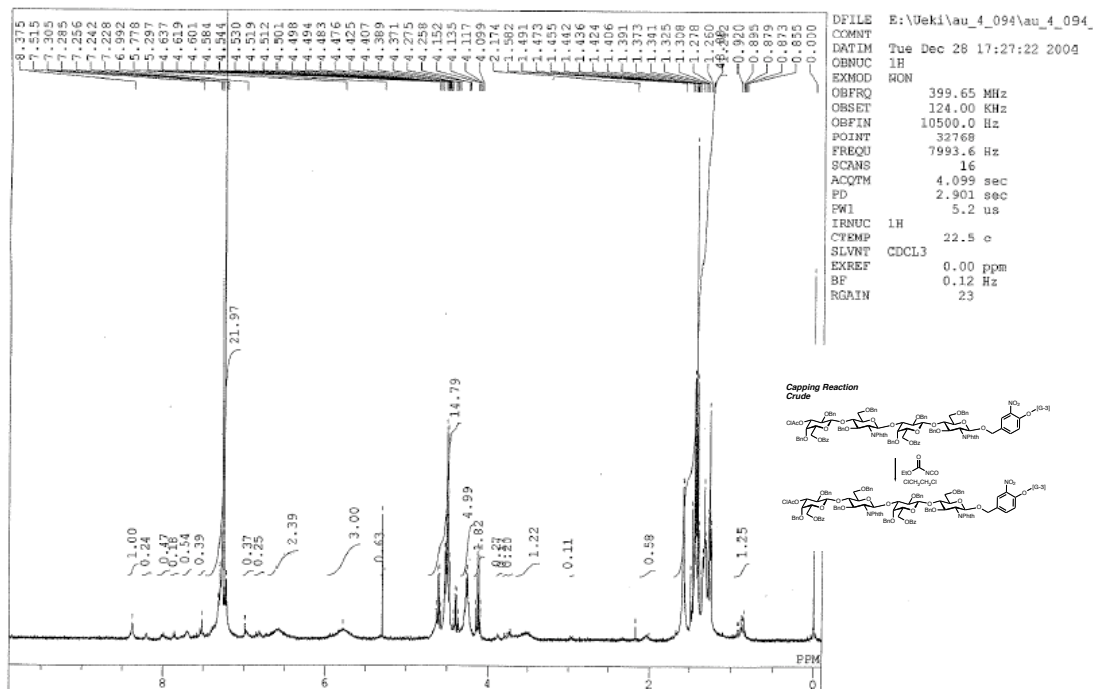

E:\Ueki\au\_4\_094\au\_4\_094\_1.ALS

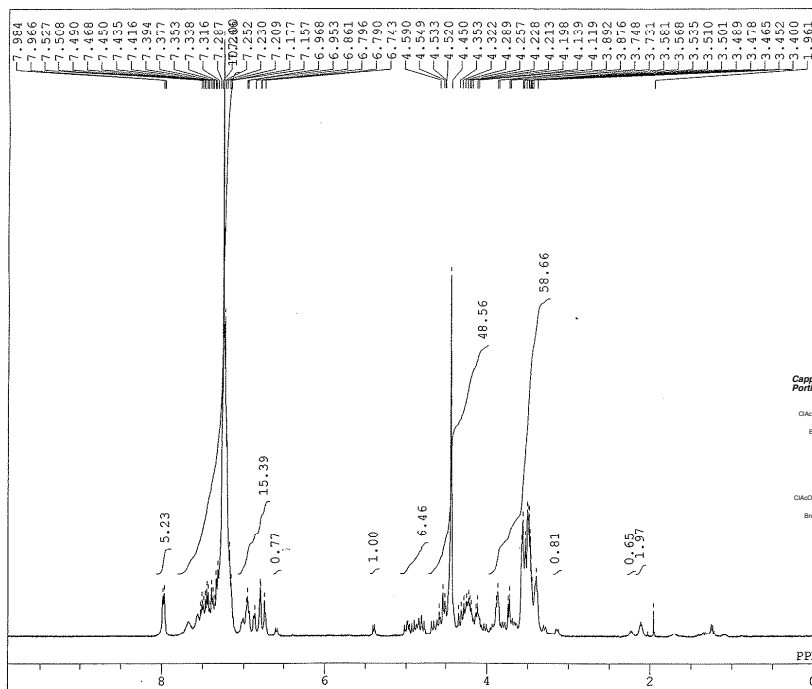

DFILE E:\Ueki\au\_4\_094\au\_4\_094\_1  
 COMPT  
 DATIM Tue Dec 28 17:19:34 2004  
 OBNUC 1H  
 EXMOD NON  
 OBFREQ 399.65 MHz  
 OBSET 124.00 KHz  
 OBFIN 10500.0 Hz  
 POINT 32768  
 FREQU 7993.6 Hz  
 SCANS 16  
 ACQTM 4.099 sec  
 PD 2.901 sec  
 PW1 5.2 us  
 IRNUC 1H  
 CTEMP 22.5 c  
 SLVNT CDCL3  
 EXREF 0.00 ppm  
 BF 0.12 Hz  
 RGAIN 11

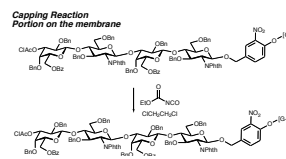

E:\Ueki\au\_4\_094\au\_4\_094\_2.ALS

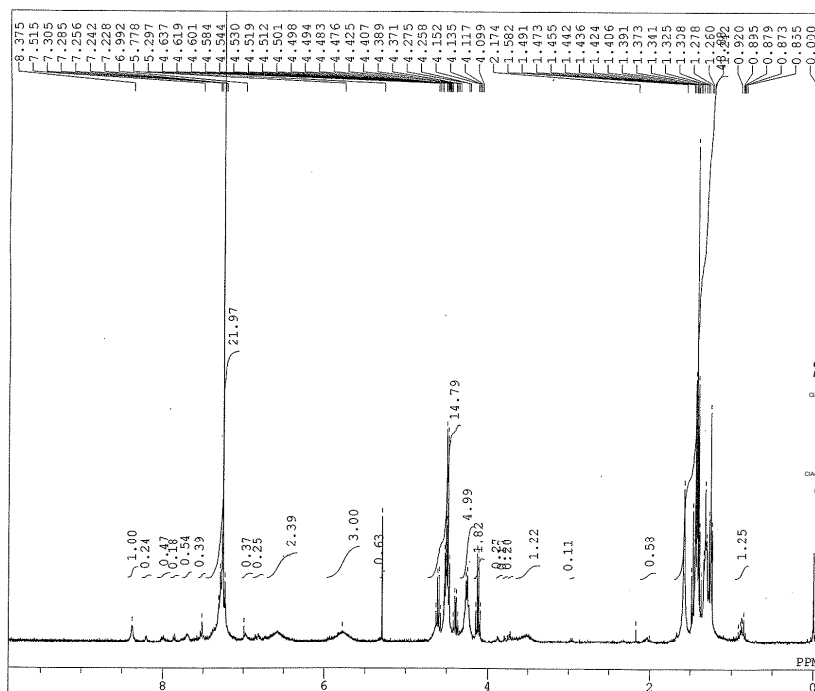

DFILE E:\Ueki\au\_4\_094\au\_4\_094\_2  
 COMPT  
 DATIM Tue Dec 28 17:27:22 2004  
 OBNUC 1H  
 EXMOD NON  
 OBFREQ 399.65 MHz  
 OBSET 124.00 KHz  
 OBFIN 10500.0 Hz  
 POINT 32768  
 FREQU 7993.6 Hz  
 SCANS 16  
 ACQTM 4.099 sec  
 PD 2.901 sec  
 PW1 5.2 us  
 IRNUC 1H  
 CTEMP 22.5 c  
 SLVNT CDCL3  
 EXREF 0.00 ppm  
 BF 0.12 Hz  
 RGAIN 23

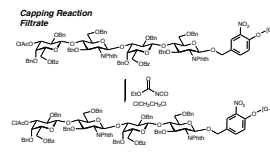



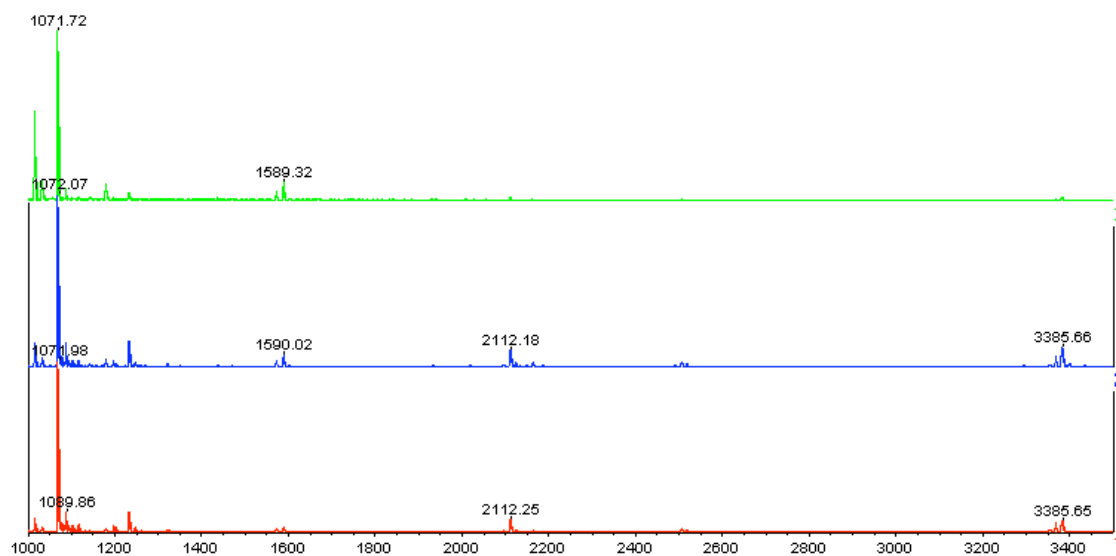

MS spectra for capping reaction; the bottom (red) spectrum is for crude mixture, the middle (blue) spectrum is for portion left on the membrane, and the upper (green) spectrum is for filtrate.

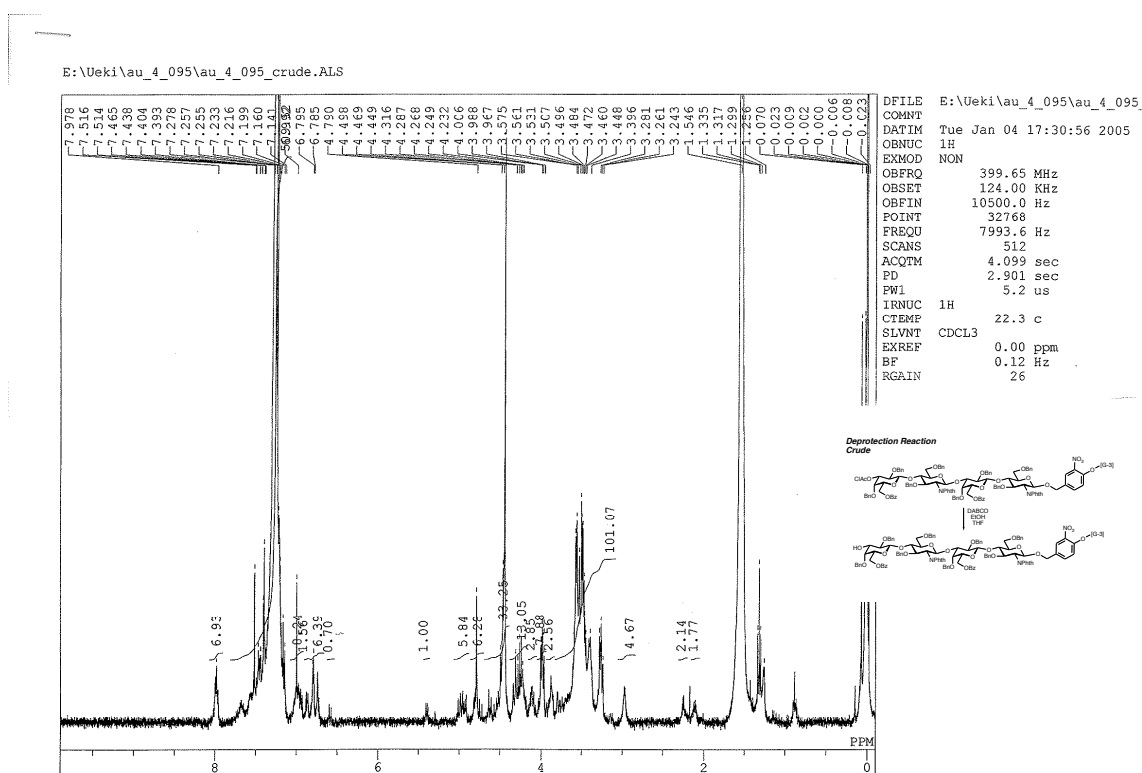



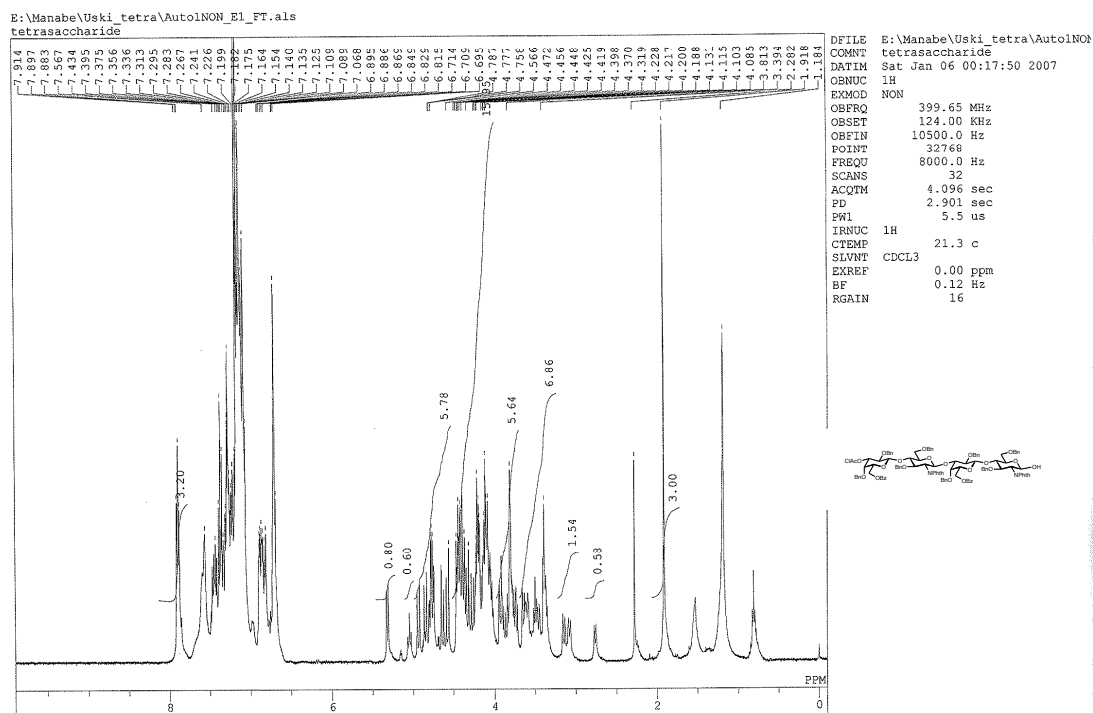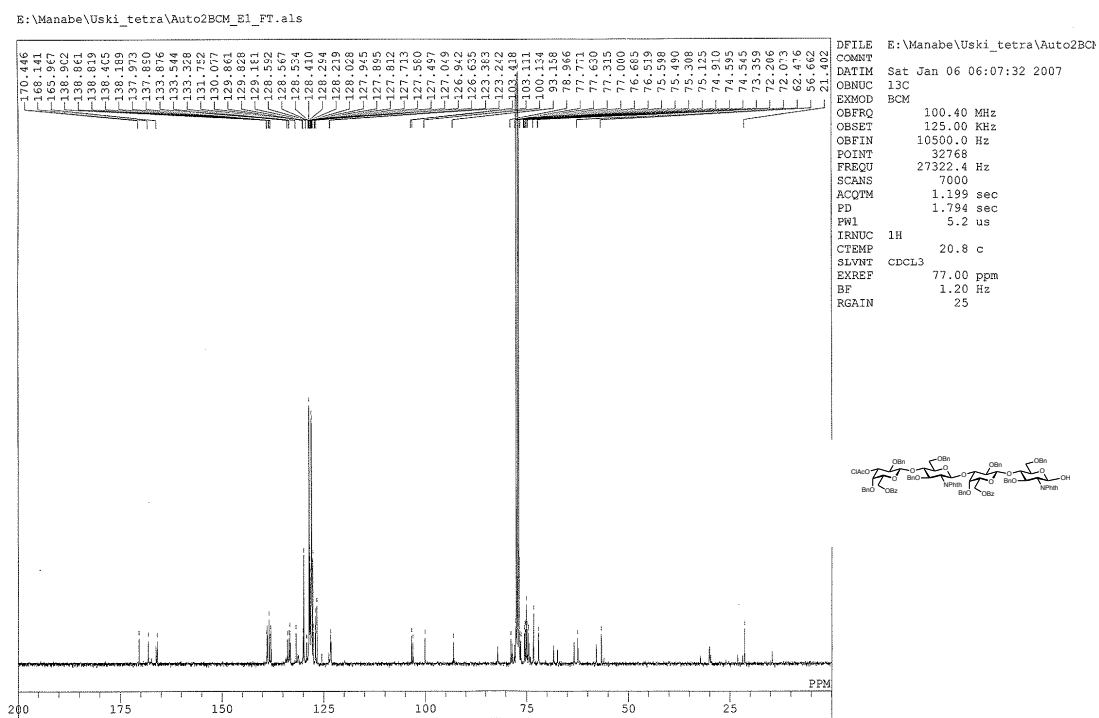

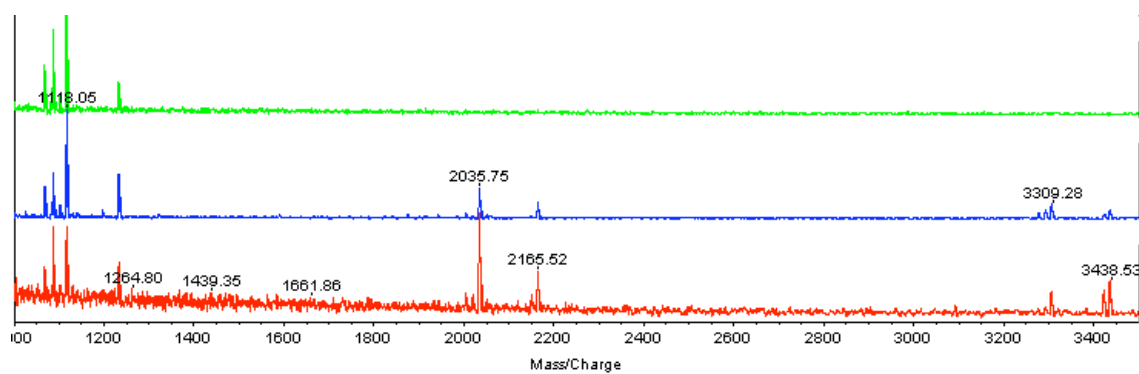

MS spectra for capping reaction; the bottom (red) spectrum is for crude mixture, the middle (blue) spectrum is for portion left on the membrane, and the upper (green) spectrum is for filtrate.
